# Supplementary material
Source: PubMed Central journal article supplement (PMC8765465)
Supplement: jb.00464-21-s0001.pdf [file jb.00464-21-s0001.pdf]

**Supplementary material to:**

Recruitment of the TolA protein to cell constriction sites in *Escherichia coli* via three separate mechanisms, and a critical role for FtsWI activity in recruitment of both TolA and TolQ.

Cynthia A. Hale, Logan Persons, and Piet A. J. de Boer

Department of Molecular Biology & Microbiology, School of Medicine, Case Western Reserve University, Cleveland, Ohio 44106-4960

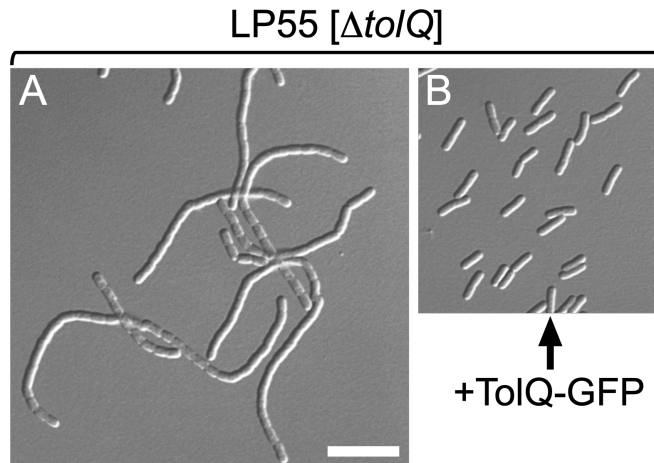

Figure S1. Correction of LP55 [ $\Delta to/Q$ ] cell chaining by TolQ-GFP fusion protein.

Differential interference contrast (DIC) images of chemically fixed cells of strain LP55 [ $\Delta to/Q$ ] carrying the vector control pMLB1113 $\Delta$ H [ $P_{lac}::$ ] (A), or pCH516 [ $P_{lac}::to/Q-gfp$ ] (B). Cultures were grown to density overnight in regular LB (0.5% NaCl), diluted 200-fold in LBNS (no added NaCl) with 5  $\mu$ M IPTG, and further incubated for  $\sim 5$  mass doublings to  $OD_{600}=0.7$ . Bar equals 10  $\mu$ m.

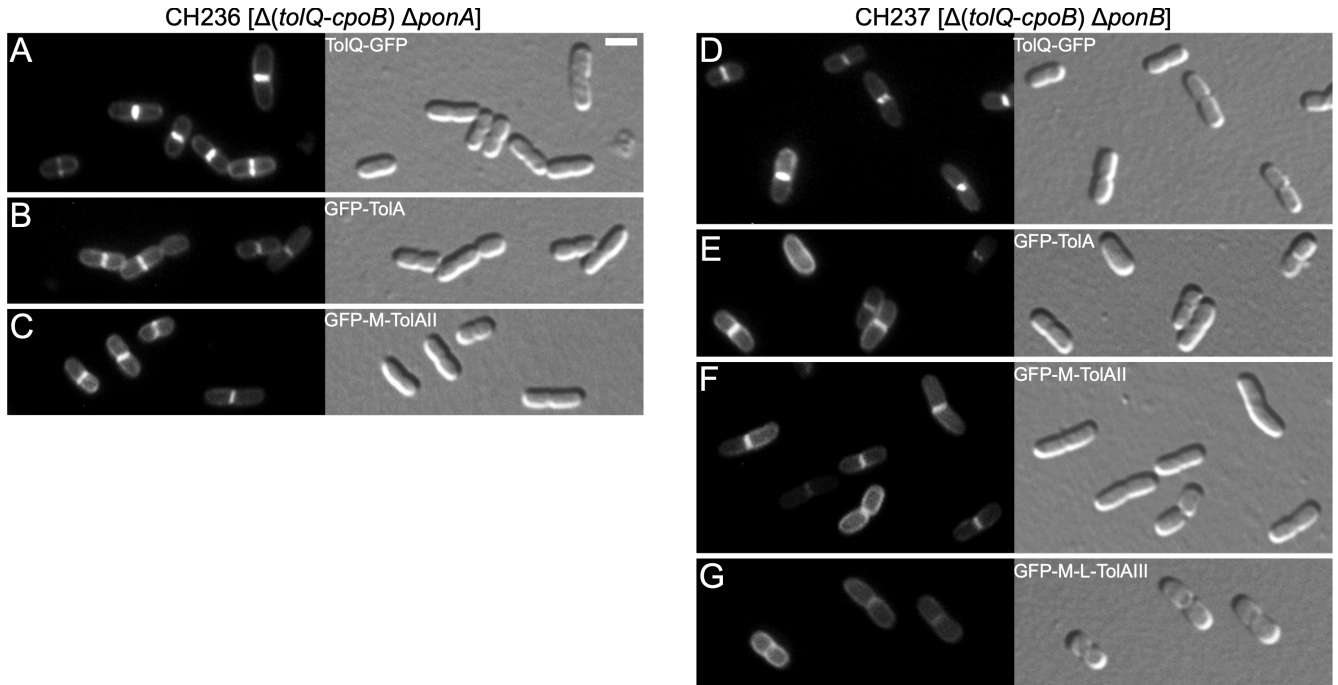

Figure S2. Septal localization of TolQ-GFP, GFP-TolA, or GFP-M-TolAII in the absence of the other Tol-Pal proteins and CpoB does not require PBP1A or PBP1B.

Shown are fluorescence (left) and DIC (right) images of live cells. Overnight cultures in LB with 1% NaCl were diluted in M9-based medium, and growth was continued for ~ 2 mass doublings to  $OD_{600} = 0.4-0.5$ . Bar equals 2  $\mu m$ .

(A-C) CH236 [ $\Delta(tolQ-cpoB) \Delta ponA$ ] cells carrying plasmid pCH516 [ $P_{lac}::tolQ-gfp$ ] (A), or lysogenic for  $\lambda NP4$  [ $P_{lac}::gfp-tolA$ ] (B) or  $\lambda CH549$  [ $P_{lac}::gfp-malF^{2-39}-tolA^{47-292}$ ] (C). Cells were grown in M9-maltose with 5  $\mu M$  (A) or 37  $\mu M$  (B and C) IPTG.

(D-G) CH237 [ $\Delta(tolQ-cpoB) \Delta ponB$ ] cells carrying plasmid pCH633 [ $P_{BAD}::tolQ-gfp$ ] (D), pCH634 [ $P_{BAD}::gfp-tolA$ ] (E), pCH635 [ $P_{BAD}::gfp-malF^{2-39}-tolA^{47-292}$ ] (F), or pCH636 [ $P_{BAD}::gfp-malF^{2-39}-rodZ^{139-255}-tolA^{294-421}$ ] (G). Cells were grown in M9-maltose without arabinose (D) or in M9-glucose with 0.02 % arabinose (E-G). Note that, while CH236 cells grew about as well as TB28 [wt], CH237 cells grew poorly in both rich and minimal medium, and CH237 cultures contained a considerable amount of cell debris. Even so, the fusion proteins could readily be localized in the surviving cells. Also note that the GFP-M-L-TolAIII fusion in panel G did not accumulate at constriction sites, and served as a control.

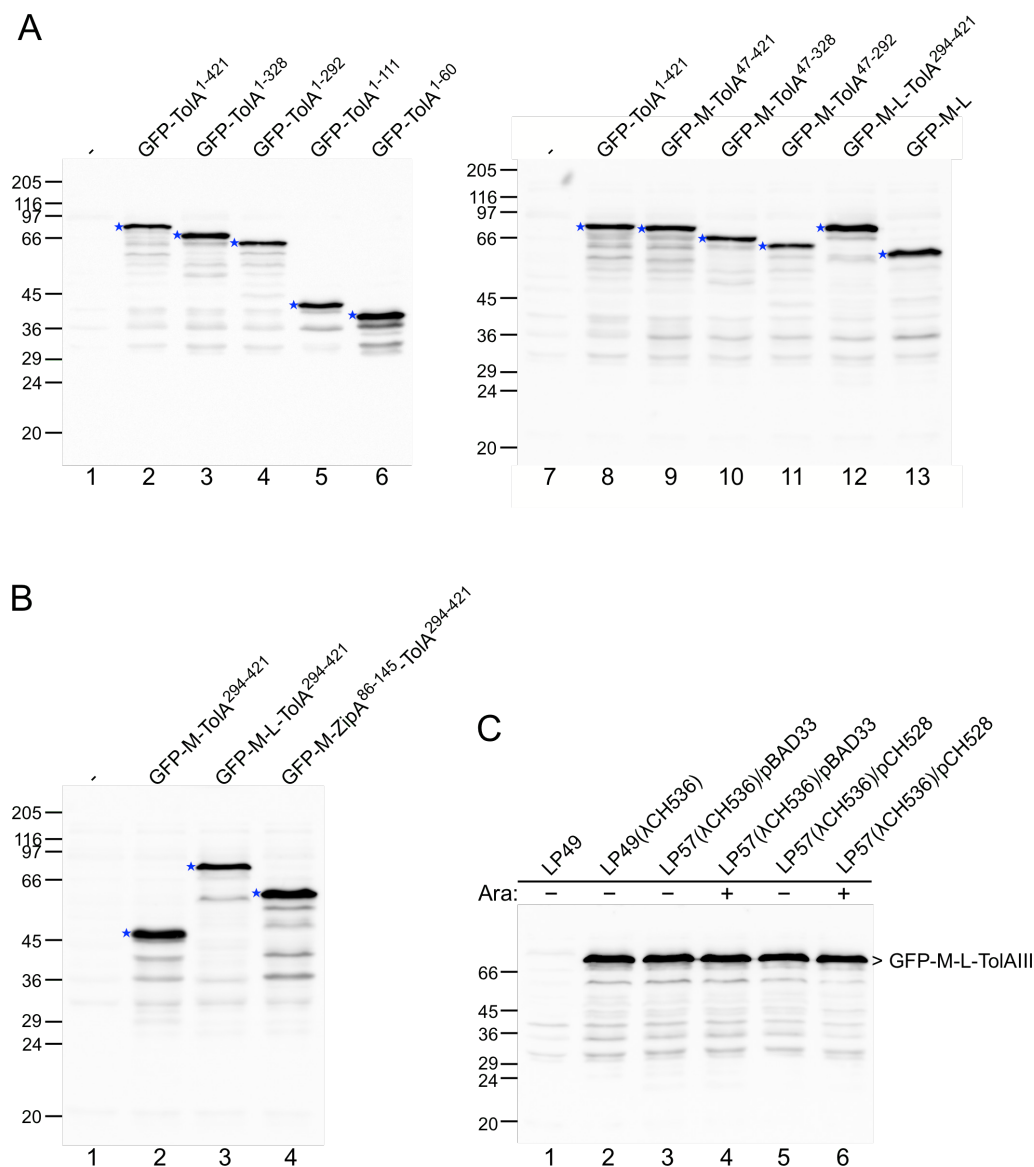

Figure S3. Immunodetection of GFP-TolA and its deletion/substitution variants.

Lanes contained equivalent amounts of whole cell extract, and fusion proteins were detected using  $\alpha$ -GFP polyclonal antibodies. In panels A and B, the phage- (A) or plasmid-encoded (B) fusion protein is indicated above each lane (M corresponds to MalF<sup>2-39</sup>, and L to RodZ<sup>139-255</sup>), and a band corresponding to the intact fusion of interest is marked with a blue star. Other bands represent non-specific antigens or breakdown products. Migration of molecular weight standards (kD) is indicated on the left of each panel.

(A) Whole-cell extracts were prepared of strain LP57 [ $\Delta tolQ$ -*cpoB*] that was either non-lysogenic (1, 7), or lysogenic for  $\lambda$ NP4 [ $P_{lac}::gfp-tolA$ ] (2, 8),  $\lambda$ DE2 [ $P_{lac}::gfp-tolA^{1-328}$ ] (3),  $\lambda$ CH512 [ $P_{lac}::gfp-tolA^{1-292}$ ] (4),  $\lambda$ CH483 [ $P_{lac}::gfp-tolA^{1-111}$ ] (5),  $\lambda$ DE3 [ $P_{lac}::gfp-tolA^{1-60}$ ] (6),  $\lambda$ CH509 [ $P_{lac}::gfp-malF^{2-39}-tolA^{47-421}$ ] (9),  $\lambda$ CH510 [ $P_{lac}::gfp-malF^{2-39}-tolA^{47-328}$ ] (10),  $\lambda$ CH549 [ $P_{lac}::gfp-malF^{2-39}-tolA^{47-292}$ ] (11),  $\lambda$ CH536 [ $P_{lac}::gfp-malF^{2-39}-rodZ^{139-255}-tolA^{294-421}$ ] (12), or  $\lambda$ CH543 [ $P_{lac}::gfp-malF^{2-39}-rodZ^{139-255}$ ] (13). Cells were grown for ~ 3.5 mass doublings to  $OD_{600}=0.5-0.6$  in M9-maltose with 37  $\mu$ M IPTG.

(B) Whole-cell extracts were prepared of strain LP49 [ $\Delta tolA$ ] carrying either no plasmid (1), or carrying pCH535 [ $P_{lac}::gfp-malF^{2-39}-tolA^{294-421}$ ] (2), pCH536 [ $P_{lac}::gfp-malF^{2-39}-rodZ^{139-255}-tolA^{294-421}$ ] (3), or pCH538 [ $P_{lac}::gfp-malF^{2-39}-zipA^{86-145}-tolA^{294-421}$ ] (4). Cells were grown for ~ 3.5 mass doublings to  $OD_{600}=0.5-0.6$  in M9-glucose with 5  $\mu$ M IPTG.

(C) Integrity of the GFP-M-L-TolAIII (GFP-MalF<sup>2-39</sup>-RodZ<sup>139-255</sup>-TolA<sup>294-421</sup>) fusion protein in the presence or absence of Tol-Pal and CpoB proteins. Cells of strains LP49 [ $\Delta tolA$ ] (1), LP49( $\lambda$ CH536) [ $\Delta tolA$  ( $P_{lac}::gfp-malF^{2-39}-rodZ^{139-255}-tolA^{294-421}$ )] (2), or LP57( $\lambda$ CH536) [ $\Delta tolQ$ -*cpoB* ( $P_{lac}::gfp-malF^{2-39}-rodZ^{139-255}-tolA^{294-421}$ )] (3-6) carrying either pBAD33 [ $P_{BAD}::$ ] (3 and 4) or pCH528 [ $P_{BAD}::tolB$  *pal* *cpoB*] (5 and 6) were grown for ~ 3.5 mass doublings to  $OD_{600}=0.5-0.6$  in M9-maltose with 37  $\mu$ M IPTG and either no (1, 2, 3, 5) or 0.01% (4, 6) arabinose, as indicated.

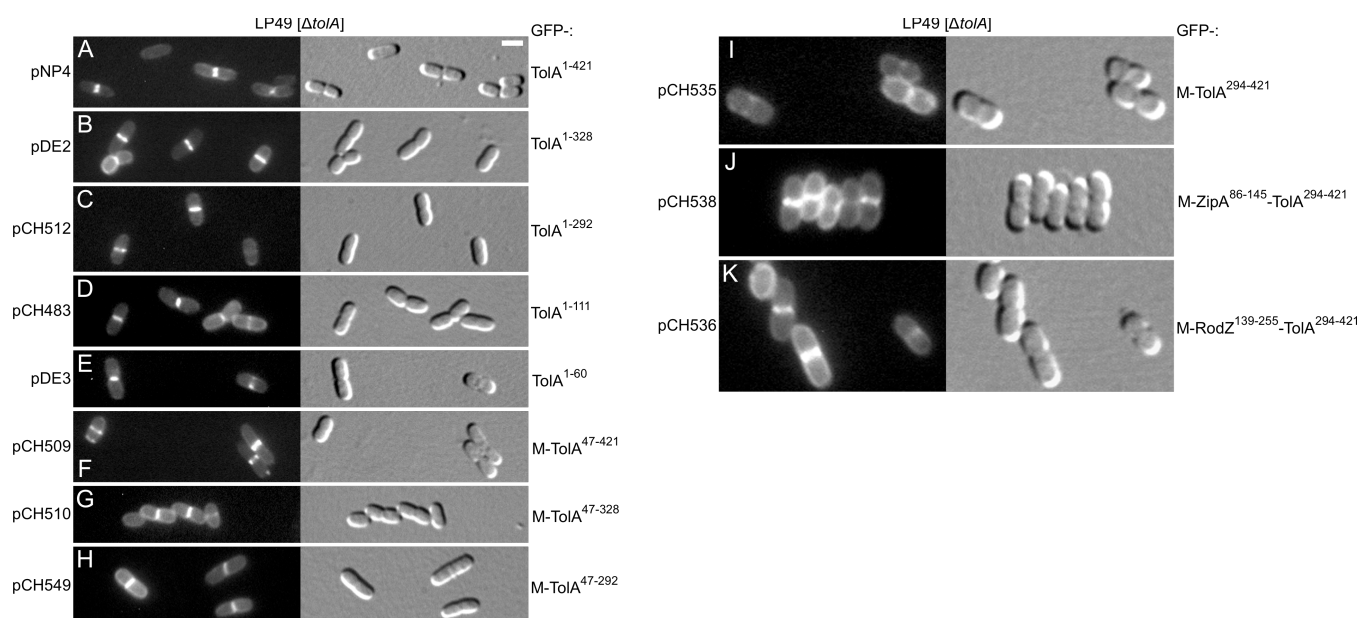

Figure S4. Localization of GFP-TolA and truncated derivatives in strain LP49 [ $\Delta tolA$ ].

Plasmids encoding GFP fusions to all (TolA<sup>1-421</sup>) or part of TolA were introduced into strain LP49 [ $\Delta tolA$ ]. Cells were grown for  $\sim 3.5$  mass doublings to  $OD_{600} = 0.5-0.6$  in M9-glucose with 5  $\mu M$  IPTG and imaged live using fluorescence and DIC optics. The name of the plasmid (left), and the fusion it encodes (right), are indicated on the sides of each panel. M (panels F-K) corresponds to MalF<sup>2-39</sup>, which includes the first transmembrane helix of MalF (MalF<sup>19-35</sup>). ZipA<sup>86-145</sup> (panel J) corresponds to a portion of the cytoplasmic linker that connects the TM and C-terminal domains of the ZipA protein. RodZ<sup>139-255</sup> (panel K) corresponds to the periplasmic linker that connects the TM and C-terminal domains of the RodZ protein. Bar equals 2.0 (A-H) or 1.2 (I-K)  $\mu m$ . Note that only plasmid pNP4 [ $P_{lac}::gfp-tolA$ ] (panel A), encoding GFP fused to full-length TolA, conferred a Tol<sup>+</sup> phenotype to these cells. Save for GFP-MalF<sup>2-39</sup>-TolA<sup>294-421</sup> (panel I), however, each fusion protein still accumulated at constriction sites to a significant degree.

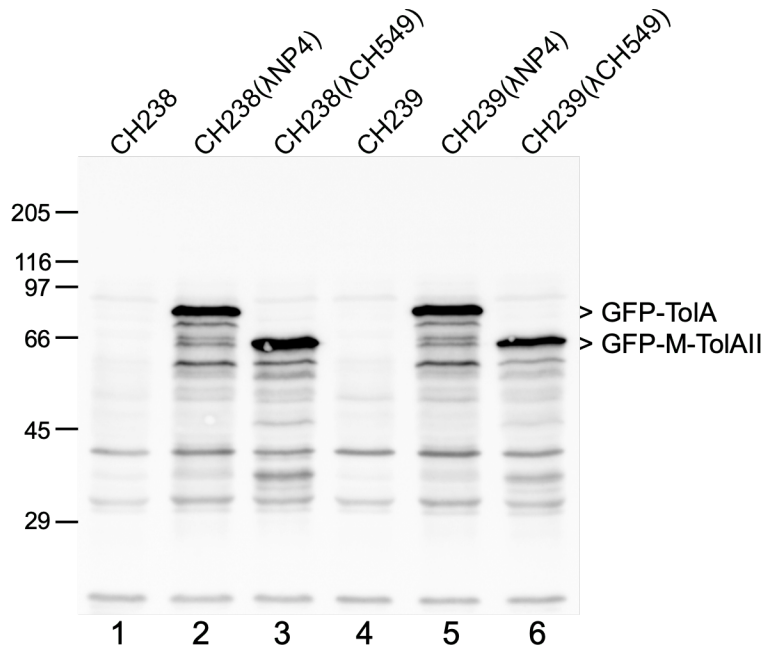

Figure S5. Integrity of GFP-TolA and GFP-M-TolAII fusion proteins in the presence and absence of FtsN.

Strains used were CH238 [ $\Delta(tolQ-cpoB)$   $ftsB^{E56A}$ ] (1), CH238 lysogenic for  $\lambda$ NP4 [ $P_{lac}::gfp-tolA$ ] (2) or for  $\lambda$ CH549 [ $P_{lac}::gfp-malF^{2-39}-tolA^{47-292}$ ] (3), strain CH239 [ $\Delta(tolQ-cpoB)$   $ftsB^{E56A}$   $\DeltaftsN$ ] (4), and CH239 lysogenic for  $\lambda$ NP4 [ $P_{lac}::gfp-tolA$ ] (5) or for  $\lambda$ CH549 [ $P_{lac}::gfp-malF^{2-39}-tolA^{47-292}$ ] (6). Cells were grown for  $\sim 3.5$  mass doublings to  $OD_{600}=0.5-0.6$  in M9-maltose with  $37 \mu M$  IPTG, and whole cell extracts were prepared. Lanes contained equivalent amounts of extract, and fusion proteins were detected using  $\alpha$ -GFP polyclonal antibodies. Bands corresponding to the intact fusion proteins are identified on the right. Other bands represent non-specific antigens (see lanes 1 and 4) or breakdown products. Migration of molecular weight standards (kD) is indicated on the left.

*E. coli* ZipA

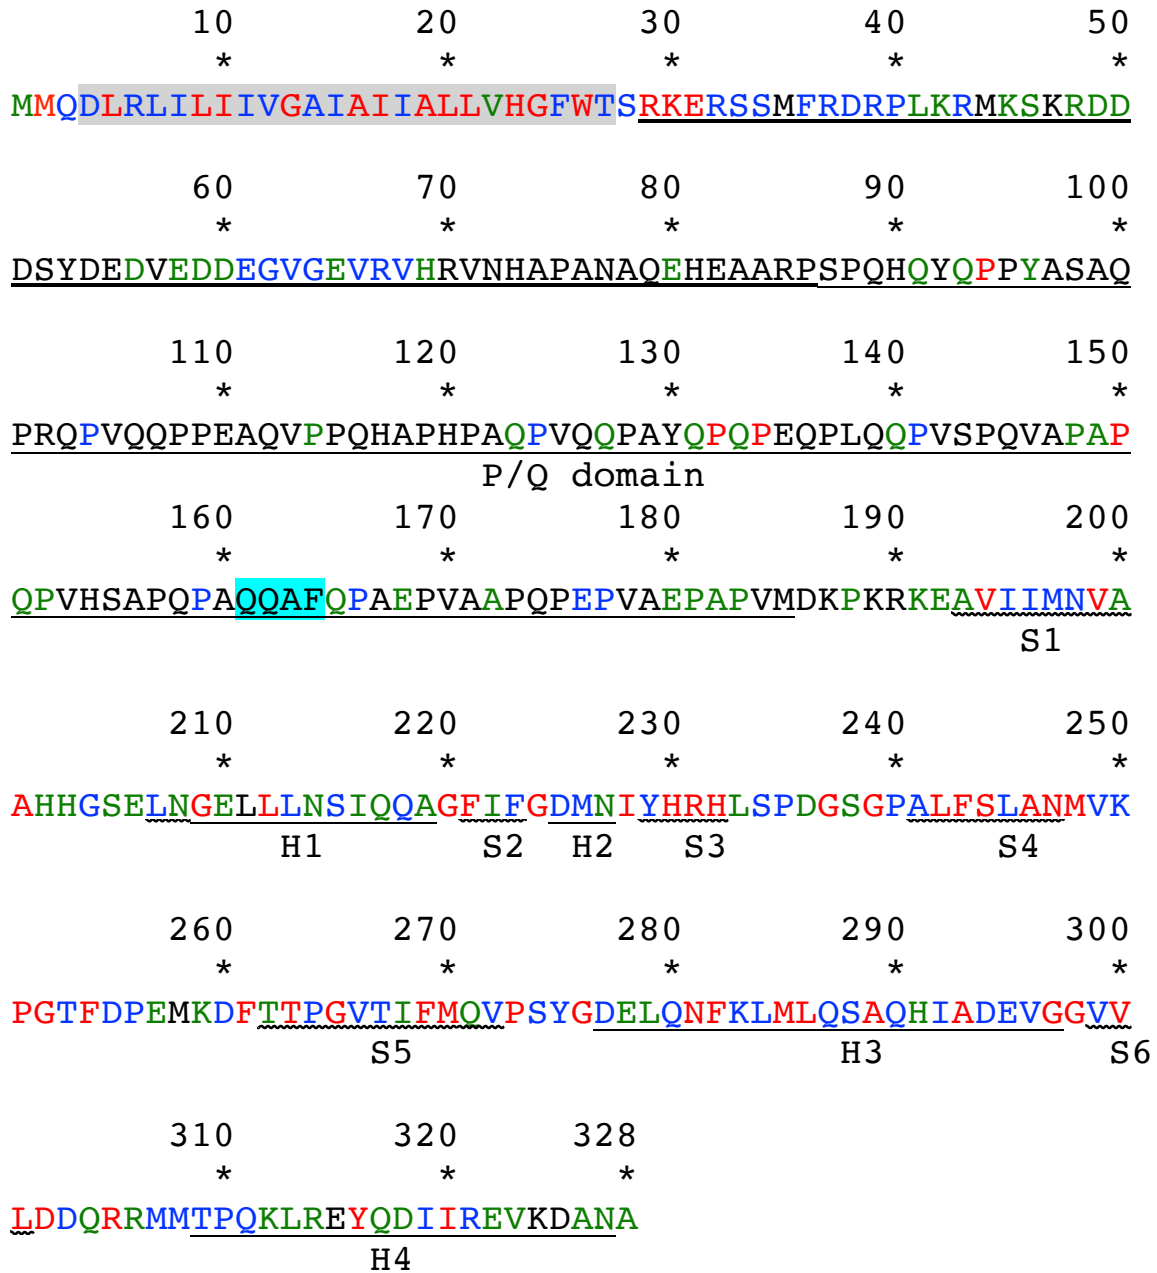

Figure S6. Primary structure of *E. coli* ZipA.

Residues are colored according to % identity in OMA group 1016422 (214 members) (1); red (100-80%), blue (80-60%), green (60-40%), and black (<40%). ZipA is a bitopic (N-out) inner membrane protein (2, 3) and transmembrane residues (ZipA<sup>4-27</sup>, as predicted in the Mebranome database (4)) are highlighted in grey. The TM domain is followed by the highly charged domain

(ZipA<sup>29-85</sup>, thick underline) the P/Q domain (ZipA<sup>86-185</sup>, thin underline), and the globular domain that binds FtsZ (ZipA<sup>186-328</sup>) (2, 3, 5). The tertiary structure of the latter has been determined (PDB:1F46) (6), and secondary structure elements ( $\beta$ -sheets S1-S6, and  $\alpha$ -helices H1-H4) are indicated. In-frame replacement of poorly conserved residues 161-164 (highlighted in turquoise) within the P/Q domain with open reading frames of fluorescent proteins yielded functional ZipA-RFP<sup>SW</sup> and ZipA-SF<sup>SW</sup>GFP<sup>SW</sup> sandwich fusions, as described in the text.

Table S1. Properties of TolA derivatives in the presence of other Tol-Pal proteins and CpoB.

| <sup>a</sup> Host: LP49 [ $\Delta tolA$ ] |                                                                         |              |                            |                                        |
|-------------------------------------------|-------------------------------------------------------------------------|--------------|----------------------------|----------------------------------------|
| <sup>b</sup> GFP-fusion                   |                                                                         |              | <sup>c</sup> at<br>constr. | <sup>d</sup> corrects cell<br>chaining |
| plasmid                                   | residues                                                                | TolA domains |                            |                                        |
| pNP4                                      | -TolA <sup>1-421</sup>                                                  | I+II+III     | +                          | +                                      |
| pDE2                                      | -TolA <sup>1-328</sup>                                                  | I+II         | +                          | -                                      |
| pCH512                                    | -TolA <sup>1-292</sup>                                                  | I+II'        | +                          | -                                      |
| pCH483                                    | -TolA <sup>1-111</sup>                                                  | I            | +                          | -                                      |
| pDE3                                      | -TolA <sup>1-60</sup>                                                   | I            | +                          | -                                      |
| pCH509                                    | -MalF <sup>2-39</sup> -TolA <sup>47-421</sup>                           | II+III       | +                          | -                                      |
| pCH510                                    | -MalF <sup>2-39</sup> -TolA <sup>47-328</sup>                           | II           | +                          | -                                      |
| pCH549                                    | -MalF <sup>2-39</sup> -TolA <sup>47-292</sup>                           | II'          | +                          | -                                      |
| pCH535                                    | -MalF <sup>2-39</sup> -TolA <sup>294-421</sup>                          | III          | -                          | -                                      |
| pCH538                                    | -MalF <sup>2-39</sup> -ZipA <sup>86-145</sup> -TolA <sup>294-421</sup>  | III          | +                          | -                                      |
| pCH536                                    | -MalF <sup>2-39</sup> -RodZ <sup>139-255</sup> -TolA <sup>294-421</sup> | III          | +                          | -                                      |

<sup>a</sup> Strain LP49 [ $\Delta tolA$ ] was transformed with one of the listed plasmids.

<sup>b</sup> Indicated are the name of the plasmid encoding the fusion under control of the *lac* regulatory region, the TolA residues encoded, and the presence of intact TolAI (TolA<sup>1-42</sup>), II (TolA<sup>48-310</sup>), and/or III (TolA<sup>314-421</sup>) domains in the fusion (7). II' indicates that the encoded TolAII domain is slightly truncated at its C-terminal end. GFP is N-terminal in all cases. MalF<sup>2-39</sup> includes the first transmembrane helix (MalF<sup>19-35</sup>) of the MalF protein (8). ZipA<sup>86-145</sup> corresponds to a portion of the cytoplasmic linker that connects the TM and C-terminal domains of the ZipA protein (3, 5). RodZ<sup>139-255</sup> corresponds to the periplasmic linker that connects the TM and C-terminal domains of the RodZ protein (9).

<sup>c</sup> Cells were grown for ~ 3.5 mass doublings to OD<sub>600</sub> = 0.5-0.6 in M9-glucose with 5  $\mu$ M IPTG and imaged live by fluorescence and DIC microscopy. GFP-fusions appeared evenly distributed along the periphery of cells (-), or accumulated at sites of cell constriction (+).

<sup>d</sup> Cells were grown for ~ 5 mass doublings to OD<sub>600</sub> = 0.9-1.1 in LBNS with 0, 5, or 25  $\mu$ M of IPTG and examined by phase contrast microscopy. Cells displayed a normal (+) or chaining (-) morphology under all three conditions.

Table S2. Septal recruitment of TolAIII by TolB, Pal, and CpoB.

| <sup>a</sup> Host: LP57( $\lambda$ CH536) [ $\Delta(tolQ-cpoB)$ ( $P_{lac}::gfp-malF^{2-39}-rodZ^{139-255}-tolA^{294-421}$ )] |                                  |     |                                   |    |     |                |                                   |    |     |                |
|-------------------------------------------------------------------------------------------------------------------------------|----------------------------------|-----|-----------------------------------|----|-----|----------------|-----------------------------------|----|-----|----------------|
| Plasmid                                                                                                                       | $P_{BAD}::$                      | Ara | all cells                         |    |     |                | constricted cells                 |    |     |                |
|                                                                                                                               |                                  |     | <sup>b</sup> at midcell (% cells) |    |     | <sup>d</sup> N | <sup>c</sup> at midcell (% cells) |    |     | <sup>d</sup> N |
|                                                                                                                               |                                  |     | ++                                | +- | --  |                | ++                                | +- | --  |                |
| pCH528                                                                                                                        | <i>tolB pal cpoB</i>             | -   | 69                                | 5  | 26  | 232            | 86                                | 5  | 9   | 182            |
| pCH518                                                                                                                        | <i>tolB pal</i>                  | -   | 0                                 | 2  | 98  | 178            | 0                                 | 3  | 97  | 143            |
| pCH545                                                                                                                        | <i>pal cpoB</i>                  | -   | 0                                 | 0  | 100 | 312            | 0                                 | 0  | 100 | 238            |
| pCH544                                                                                                                        | <i>tolB pal<sup>0</sup> cpoB</i> | -   | 3                                 | 5  | 92  | 366            | 5                                 | 7  | 88  | 243            |
| pBAD33                                                                                                                        | -                                | -   | 0                                 | 1  | 99  | 157            | 0                                 | 1  | 99  | 101            |
| pCH518                                                                                                                        | <i>tolB pal</i>                  | +   | 1                                 | 1  | 98  | 587            | 1                                 | 2  | 97  | 449            |
| pCH545                                                                                                                        | <i>pal cpoB</i>                  | +   | 2                                 | 2  | 96  | 123            | 2                                 | 2  | 96  | 82             |
| pCH544                                                                                                                        | <i>tolB pal<sup>0</sup> cpoB</i> | +   | 3                                 | 9  | 88  | 133            | 4                                 | 12 | 84  | 103            |
| pBAD33                                                                                                                        | -                                | +   | 0                                 | 0  | 100 | 341            | 0                                 | 0  | 100 | 254            |
|                                                                                                                               |                                  |     |                                   |    |     |                |                                   |    |     |                |

<sup>a</sup> LP57( $\lambda$ CH536) cells carrying the indicated plasmid were grown for ~ 3.5 mass doublings to OD<sub>600</sub>= 0.5-0.6 in M9-maltose with 37  $\mu$ M IPTG and either no (-) or 0.01% (+) arabinose.

<sup>b,c</sup> Percentage of all cells, or of those with a visible constriction, in which the GFP-fusion accumulated strongly (++) or weakly (+-) at the constriction site, or appeared evenly distributed along the cell periphery (--).

<sup>d</sup> Number of cells scored.

Table S3. Effects of low concentrations of Aztreonam on accumulation of TolQ-GFP or GFP-TolA at constriction sites of cells lacking the other Tol-Pal proteins and CpoB.

| <sup>a</sup> Host: CH244 [ $\Delta(tolQ-cpoB)$ <i>zipA-rfp</i> <sup>SW</sup> ] |       |                  |                                |       |                            |                |                        |                |                                   |     |       |                |
|--------------------------------------------------------------------------------|-------|------------------|--------------------------------|-------|----------------------------|----------------|------------------------|----------------|-----------------------------------|-----|-------|----------------|
| Row                                                                            | GFP   | Aztr.<br>(ng/ml) | <sup>b</sup> Length ( $\mu$ m) |       | <sup>c</sup> Constrictions |                | <sup>d</sup> GFP Rings |                | <sup>e</sup> (co)localization (%) |     |       | <sup>f</sup> N |
|                                                                                |       |                  | mean                           | total | total                      | L/C ( $\mu$ m) | total                  | L/R ( $\mu$ m) | RwC                               | CwR | Depl. |                |
| 1                                                                              | TolQ- | 0                | 3.4                            | 97    | 23                         | 4.2            | 23                     | 4.2            | 100                               | 100 | 0     | 28             |
| 2                                                                              | "     | 20               | 4.8                            | 124   | 31                         | 4.0            | 32                     | 3.9            | 94                                | 97  | 0     | 26             |
| 3                                                                              | "     | 50               | 8.3                            | 307   | 36                         | 8.5            | 38                     | 8.1            | 95                                | 97  | 0     | 37             |
|                                                                                |       |                  |                                |       |                            |                |                        |                |                                   |     |       |                |
| 4                                                                              | -TolA | 0                | 3.1                            | 513   | 95                         | 5.4            | 88                     | 5.8            | 98                                | 91  | 0     | 163            |
| 5                                                                              | "     | 20               | 6.2                            | 268   | 52                         | 5.2            | 15                     | 17.9           | 100                               | 29  | 10    | 43             |
| 6                                                                              | "     | 50               | 13.8                           | 359   | 34                         | 10.6           | 0                      | >359           | -                                 | 0   | 44    | 26             |

<sup>a</sup>Three identical cultures each of strain CH244 carrying pCH633 [*P*<sub>BAD</sub>::*tolQ-gfp*] (rows 1-3) or pCH634 [*P*<sub>BAD</sub>::*gfp-tolA*] (rows 4-6) were inoculated to a starting density of OD<sub>600</sub>=0.09 in M9-glucose with 0.005% (1-3) or 0.030 % (4-6) arabinose. After growth for 100 min, aztreonam was added as indicated, and growth was continued for another 210-240 min before live-cell imaging with DIC and fluorescence optics. Cellular parameters, including length (L) and the presence and location of visible constrictions (C) and of fluorescent rings (R) formed by TolQ-GFP (1-3) or GFP-TolA (4-6) were measured and analyzed using the ObjectJ plugin (10) in Fiji (11). See also figure 9.

<sup>b-d</sup> Total values represent the sums of lengths, or of the number of constrictions or fluorescent rings, of all cells analyzed. These values were also used to calculate the ratios of total cell length to total number of constrictions (L/C), or to total number of green-fluorescent rings (L/R).

<sup>e</sup> Percentages of fluorescent rings co-localized with a cell constriction (RwC), of cell constrictions co-localized with a fluorescent ring (CwR), and of cell constrictions at which green fluorescent signal appears depleted (Depl.) are given.

<sup>f</sup> Number of cells measured.

Table S4. *E.coli* strains used in this study.

| Strain   | Relevant genotype                                                                                                                                          | Source or Reference |
|----------|------------------------------------------------------------------------------------------------------------------------------------------------------------|---------------------|
| BL78     | TB28, <i>cpoB</i> <> <i>aph</i>                                                                                                                            | This work           |
| BL130    | TB28, <i>zipA-rfp</i> <sup>SW</sup> <i>yfeN</i> <> <i>frt</i>                                                                                              | This work           |
| BL167    | TB28, <i>ftsB</i> <sup>E56A</sup>                                                                                                                          | (12)                |
| BL173    | TB28, <i>ftsB</i> <sup>E56A</sup> <i>ftsN</i> <> <i>aph</i>                                                                                                | (12)                |
| BW25113  | $\Delta(\text{araD-araB})567 \Delta \text{lacZ4787} (::\text{rrnB-3}) \lambda^- \text{rph-1}$<br>$\Delta(\text{rhaD-rhaB})568 \text{hsdR514}$              | (13)                |
| CH82     | TB28, <i>ponA</i> <> <i>frt</i>                                                                                                                            | (12)                |
| CH119    | TB28, <i>yfeN</i> <> <i>aph</i>                                                                                                                            | This work           |
| CH120    | TB28, $\Delta\text{galK}$ ( $\lambda\text{c1857 cro-bioA}<>\text{tetA}$ ) <i>yfeN</i> <> <i>aph</i>                                                        | This work           |
| CH121*   | TB28, $\Delta\text{galK}$ ( $\lambda\text{c1857 cro-bioA}<>\text{tetA}$ )<br><i>zipA</i> <> $\text{P}_{\text{EM7}}::\text{galK}$ <i>yfeN</i> <> <i>aph</i> | This work           |
| CH123    | TB28, $\Delta\text{galK}$ ( $\lambda\text{c1857 cro-bioA}<>\text{tetA}$ ) <i>zipA-rfp</i> <sup>SW</sup><br><i>yfeN</i> <> <i>aph</i>                       | This work           |
| CH125    | TB28, <i>zipA</i> <sup>1-160</sup> - <i>rfp-zipA</i> <sup>165-328</sup> ( <i>zipA-rfp</i> <sup>SW</sup> <i>yfeN</i> <> <i>aph</i> )                        | This work           |
| CH127    | TB28, $\Delta\text{galK}$ ( $\lambda\text{c1857 cro-bioA}<>\text{tetA}$ ) <i>zipA-stgfp</i> <sup>SW</sup><br><i>yfeN</i> <> <i>aph</i>                     | This work           |
| CH128    | TB28, <i>zipA-stgfp</i> <sup>SW</sup> <i>yfeN</i> <> <i>aph</i>                                                                                            | This work           |
| CH235    | TB28, <i>ftsB</i> <sup>E56A</sup> <i>ftsN</i> <> <i>frt</i>                                                                                                | This work           |
| CH236    | TB28, <i>ponA</i> <> <i>frt</i> ( <i>tolQ-cpoB</i> )<> <i>aph</i>                                                                                          | This work           |
| CH237    | TB28, <i>ponB</i> <> <i>frt</i> ( <i>tolQ-cpoB</i> )<> <i>aph</i>                                                                                          | This work           |
| CH238    | TB28, <i>ftsB</i> <sup>E56A</sup> ( <i>tolQ-cpoB</i> )<> <i>aph</i>                                                                                        | This work           |
| CH239    | TB28, <i>ftsB</i> <sup>E56A</sup> <i>ftsN</i> <> <i>frt</i> ( <i>tolQ-cpoB</i> )<> <i>aph</i>                                                              | This work           |
| CH241    | TB28, <i>zipA-rfp</i> <sup>SW</sup> <i>yfeN</i> <> <i>frt tolQ</i> <> <i>aph</i>                                                                           | This work           |
| CH242    | TB28, <i>zipA-rfp</i> <sup>SW</sup> <i>yfeN</i> <> <i>frt tolA</i> <> <i>aph</i>                                                                           | This work           |
| JW0727-1 | BW25113, <i>tolQ</i> <> <i>aph</i>                                                                                                                         | (14)                |
| JW0728-1 | BW25113, <i>tolR</i> <> <i>aph</i>                                                                                                                         | (14)                |
| JW2399-2 | BW25113, <i>yfeN</i> <> <i>aph</i>                                                                                                                         | (14)                |
| JW5100-1 | BW25113, <i>tolB</i> <> <i>aph</i>                                                                                                                         | (14)                |
| KG11     | TB28, $\Delta\text{galK}$ ( $\lambda\text{c1857 cro-bioA}<>\text{tetA}$ )                                                                                  | This work           |
| LP11     | TB28, <i>ponB</i> <> <i>frt</i>                                                                                                                            | (15)                |
| LP49     | TB28, <i>tolA</i> <> <i>aph</i>                                                                                                                            | This work           |

|        |                                                                                                                                                                                                                                                                                                   |           |
|--------|---------------------------------------------------------------------------------------------------------------------------------------------------------------------------------------------------------------------------------------------------------------------------------------------------|-----------|
| LP50   | TB28, ( <i>tolA-pal</i> )<> <i>aph</i>                                                                                                                                                                                                                                                            | This work |
| LP51   | TB28, ( <i>tolR-pal</i> )<> <i>aph</i>                                                                                                                                                                                                                                                            | This work |
| LP53   | TB28, <i>tolB</i> <> <i>aph</i>                                                                                                                                                                                                                                                                   | This work |
| LP54   | TB28, <i>tolR</i> <> <i>aph</i>                                                                                                                                                                                                                                                                   | This work |
| LP55   | TB28, <i>tolQ</i> <> <i>aph</i>                                                                                                                                                                                                                                                                   | This work |
| LP56   | TB28, ( <i>tolQ-tolA</i> )<> <i>aph</i>                                                                                                                                                                                                                                                           | This work |
| LP57   | TB28, ( <i>tolQ-cpoB</i> )<> <i>aph</i>                                                                                                                                                                                                                                                           | This work |
| LP58   | TB28, ( <i>tolQ-tolR</i> )<> <i>aph</i>                                                                                                                                                                                                                                                           | This work |
| MG4    | TB28, ( <i>tolQ-pal</i> )<> <i>aph</i>                                                                                                                                                                                                                                                            | (16)      |
| MG5    | TB28, <i>pal</i> <> <i>aph</i>                                                                                                                                                                                                                                                                    | (16)      |
| MG24   | TB28 ( <i>tolB-pal</i> )<> <i>aph</i>                                                                                                                                                                                                                                                             | This work |
| MG28   | TB10, <i>cpoB</i> <> <i>aph</i>                                                                                                                                                                                                                                                                   | This work |
| MG31   | TB28, <i>nadA</i> ::Tn10 <i>gal490</i> $\lambda$ cI857 $\Delta$ ( <i>cro-bioA</i> )<br><i>cpoB</i> <> <i>aph</i>                                                                                                                                                                                  | This work |
| MG1655 | <i>ilvG rfb50 rph1</i>                                                                                                                                                                                                                                                                            | (17)      |
| SW102  | <i>mcrA</i> $\Delta$ ( <i>mrr-hsdRMS-mcrBC</i> ) $\Delta$ <i>lacX74 deoR endA1</i><br><i>araD139</i> $\Delta$ ( <i>ara, leu</i> )7697 <i>rpsL recA1 nupG</i><br>$\phi$ 80 <i>dlacZ</i> $\Delta$ M15 $\Delta$ <i>galK</i> ( $\lambda$ c1857 <i>cro-bioA</i> <> <i>tetA</i> ) <i>P1<sup>R</sup></i> | (18)      |
| TB10   | MG1655, <i>nadA</i> ::Tn10 <i>gal490</i> $\lambda$ cI857 $\Delta$ ( <i>cro-bioA</i> )                                                                                                                                                                                                             | (19)      |
| TB28   | MG1655, <i>lacIZYA</i> <> <i>frt</i>                                                                                                                                                                                                                                                              | (20)      |

The symbol <> denotes DNA replacement by recombineering, and *frt* a scar sequence remaining after eviction of an *aph* or *cat* cassette by FLP recombinase (13, 21). *zipA-rfp<sup>SW</sup>* is short notation for *zipA*<sup>1-160</sup>-*mcherry-zipA*<sup>165-328</sup>, and *zipA<sub>-sf</sub>gfp<sup>SW</sup>* for *zipA*<sup>1-160</sup>-*sfgfp-zipA*<sup>165-328</sup>. (\*) Note that strain CH121 required an appropriate plasmid for survival.

Table S5. Plasmids and phages used in this study.

| Construct    | Relevant genotype <sup>a</sup>                                                                                                | ori   | Source or Reference |
|--------------|-------------------------------------------------------------------------------------------------------------------------------|-------|---------------------|
| Plasmids:    |                                                                                                                               |       |                     |
| pBAD33       | <i>cat araC</i> P <sub>BAD</sub> ::                                                                                           | pACYC | (22)                |
| pBL34        | <i>bla lacI<sup>q</sup></i> P <sub>lac</sub> :: <i>torA</i> <sup>1-43</sup> - <i>gfp-cwIC</i> <sup>181-255</sup>              | ColE1 | (23)                |
| pBL74        | <i>attHK022 bla lacI<sup>q</sup></i> P <sub>lac</sub> :: <i>dsbA</i> <sup>1-24</sup> - <i>rfp-cwIC</i> <sup>181-255</sup>     | R6K   | This work           |
| pBL75        | <i>bla lacI<sup>q</sup></i> P <sub>lac</sub> :: <i>dsbA</i> <sup>1-24</sup> - <i>rfp-cwIC</i> <sup>181-255</sup>              | ColE1 | This work           |
| pBL126       | <i>bla lacI<sup>q</sup></i> P <sub>lac</sub> :: <i>cpoB-rfp</i>                                                               | ColE1 | This work           |
| pBL134       | <i>bla lacI<sup>q</sup></i> P <sub>lac</sub> :: <i>cpoB</i>                                                                   | ColE1 | This work           |
| pBL169       | <i>bla lacI<sup>q</sup></i> P <sub>lac</sub> :: <i>t18-dedD</i> <sup>1-54</sup> - <i>le</i>                                   | ColE1 | (15)                |
| pBSK-GS42810 | <i>bla</i> <i>sfgfp</i>                                                                                                       | ColE1 | Epoch Life Science  |
| pCH151       | <i>bla lacI<sup>q</sup></i> P <sub>lac</sub> :: <i>zipA-gfp</i>                                                               | ColE1 | (20)                |
| pCH181       | <i>bla lacI<sup>q</sup></i> P <sub>lac</sub> :: <i>gfp-minD minE</i> <sup>K88E</sup>                                          | ColE1 | (24)                |
| pCH201       | <i>bla lacI<sup>q</sup></i> P <sub>lac</sub> :: <i>gfp-ftsN</i>                                                               | ColE1 | (25)                |
| pCH279       | <i>bla lacI<sup>q</sup></i> P <sub>lac</sub> :: <i>ftsA</i> <sup>R286W</sup>                                                  | ColE1 | This work           |
| pCH310       | <i>bla lacI<sup>q</sup></i> P <sub>lac</sub> :: <i>gfp-malF</i> <sup>2-39</sup> - <i>ftsN</i> <sup>65-123</sup>               | ColE1 | (12)                |
| pCH311       | <i>bla lacI<sup>q</sup></i> P <sub>lac</sub> :: <i>zipA-rfp</i>                                                               | ColE1 | (9)                 |
| pCH364       | <i>bla lacI<sup>q</sup></i> P <sub>lac</sub> :: <i>t18-lacZ</i>                                                               | ColE1 | (9)                 |
| pCH421       | <i>bla lacI<sup>q</sup></i> P <sub>tac</sub> :: <i>gfp-malF</i> <sup>2-39</sup> - <i>rodZ</i> <sup>139-337</sup>              | ColE1 | This work           |
| pCH455       | <i>bla lacI<sup>q</sup></i> P <sub>lac</sub> :: <i>pal</i> <sup>1-35</sup> - <i>rfp</i> -                                     | ColE1 | This work           |
| pCH480       | <i>bla lacI<sup>q</sup></i> P <sub>lac</sub> :: <i>t18-tolA</i> <sup>1-111</sup> - <i>e</i>                                   | ColE1 | This work           |
| pCH483       | <i>bla lacI<sup>q</sup></i> P <sub>lac</sub> :: <i>gfp-tolA</i> <sup>1-111</sup> - <i>e</i>                                   | ColE1 | This work           |
| pCH491       | <i>bla lacI<sup>q</sup></i> P <sub>T7</sub> :: <i>zipA</i> <sup>1-160</sup> - <i>rfp-zipA</i> <sup>165-328</sup> - <i>h</i>   | ColE1 | This work           |
| pCH494       | <i>bla lacI<sup>q</sup></i> P <sub>T7</sub> :: <i>zipA</i> <sup>1-160</sup> - <i>sfgfp-zipA</i> <sup>165-328</sup> - <i>h</i> | ColE1 | This work           |
| pCH495       | <i>bla lacI<sup>q</sup></i> P <sub>lac</sub> :: <i>t18-tolA</i> <sup>294-421</sup>                                            | ColE1 | This work           |
| pCH502       | <i>bla lacI<sup>q</sup></i> P <sub>lac</sub> :: <i>t18-tolA</i> <sup>47-421</sup>                                             | ColE1 | This work           |
| pCH506       | <i>bla lacI<sup>q</sup></i> P <sub>T7</sub> :: <i>h-sumo-kck-tolA</i> <sup>47-421</sup>                                       | ColE1 | This work           |
| pCH508       | <i>bla lacI<sup>q</sup></i> P <sub>lac</sub> :: <i>gfp-t-malF</i> <sup>2-39</sup> -                                           | ColE1 | This work           |
| pCH509       | <i>bla lacI<sup>q</sup></i> P <sub>lac</sub> :: <i>gfp-malF</i> <sup>2-39</sup> - <i>tolA</i> <sup>47-421</sup>               | ColE1 | This work           |

|        |                                                                                                                    |                      |           |
|--------|--------------------------------------------------------------------------------------------------------------------|----------------------|-----------|
| pCH510 | <i>bla lacI<sup>q</sup> P<sub>lac</sub>::gfp-malF<sup>2-39</sup>-tolA<sup>47-328</sup>-le</i>                      | ColE1                | This work |
| pCH511 | <i>bla lacI<sup>q</sup> P<sub>T7</sub>::h-sumo-kck-tolA<sup>47-292</sup>-h</i>                                     | ColE1                | This work |
| pCH512 | <i>bla lacI<sup>q</sup> P<sub>lac</sub>::gfp-tolA<sup>1-292</sup>-le</i>                                           | ColE1                | This work |
| pCH515 | <i>bla lacI<sup>q</sup> P<sub>T7</sub>::tolQ-h</i>                                                                 | ColE1                | This work |
| pCH516 | <i>bla lacI<sup>q</sup> P<sub>lac</sub>::tolQ-gfp</i>                                                              | ColE1                | This work |
| pCH518 | <i>cat araC P<sub>BAD</sub>::tolB pal</i>                                                                          | pACYC                | This work |
| pCH519 | <i>bla lacI<sup>q</sup> P<sub>lac</sub>::dsbA<sup>1-24</sup>-rfp-tolA<sup>294-421</sup></i>                        | ColE1                | This work |
| pCH520 | <i>bla lacI<sup>q</sup> P<sub>lac</sub>::torA<sup>1-43</sup>-gfp-tolA<sup>294-421</sup></i>                        | ColE1                | This work |
| pCH522 | <i>cat araC P<sub>BAD</sub>::tolB pal-sf-gfp</i>                                                                   | pACYC                | This work |
| pCH525 | <i>cat araC P<sub>BAD</sub>::pal</i>                                                                               | pACYC                | This work |
| pCH528 | <i>cat araC P<sub>BAD</sub>::tolB pal cpoB</i>                                                                     | pACYC                | This work |
| pCH535 | <i>bla lacI<sup>q</sup> P<sub>lac</sub>::gfp-malF<sup>2-39</sup>-tolA<sup>294-421</sup></i>                        | ColE1                | This work |
| pCH536 | <i>bla lacI<sup>q</sup> P<sub>lac</sub>::gfp-malF<sup>2-39</sup>-rodZ<sup>139-255</sup>-tolA<sup>294-421</sup></i> | ColE1                | This work |
| pCH537 | <i>bla lacI<sup>q</sup> P<sub>lac</sub>::gfp-malF<sup>2-39</sup>-zipA<sup>86-145</sup>-pal<sup>63-173</sup></i>    | ColE1                | This work |
| pCH538 | <i>bla lacI<sup>q</sup> P<sub>lac</sub>::gfp-malF<sup>2-39</sup>-zipA<sup>86-145</sup>-tolA<sup>294-421</sup></i>  | ColE1                | This work |
| pCH543 | <i>bla lacI<sup>q</sup> P<sub>lac</sub>::gfp-malF<sup>2-39</sup>-rodZ<sup>139-255</sup>-e</i>                      | ColE1                | This work |
| pCH544 | <i>cat araC P<sub>BAD</sub>::tolB pal<sup>0</sup> ybgF</i>                                                         | pACYC                | This work |
| pCH545 | <i>cat araC P<sub>BAD</sub>::pal cpoB</i>                                                                          | pACYC                | This work |
| pCH546 | <i>cat araC P<sub>BAD</sub>::cpoB</i>                                                                              | pACYC                | This work |
| pCH549 | <i>bla lacI<sup>q</sup> P<sub>lac</sub>::gfp-malF<sup>2-39</sup>-tolA<sup>47-292</sup>-le</i>                      | ColE1                | This work |
| pCH555 | <i>cat araC P<sub>BAD</sub>::tolA</i>                                                                              | pACYC                | This work |
| pCH633 | <i>cat araC P<sub>BAD</sub>::tolQ-gfp</i>                                                                          | pACYC                | This work |
| pCH634 | <i>cat araC P<sub>BAD</sub>::gfp-tolA</i>                                                                          | pACYC                | This work |
| pCP20  | <i>bla cat repA<sup>ts</sup> cl857 P<sub>λR</sub>::flp</i>                                                         | pSC101 <sup>ts</sup> | (26)      |
| pCS7   | <i>bla lacI<sup>q</sup> P<sub>T7</sub>::h-sumo-kck-</i>                                                            | ColE1                | This work |
| pDB297 | <i>bla lacI<sup>q</sup> P<sub>lac</sub>::ftsA</i>                                                                  | ColE1                | (27)      |
| pDE2   | <i>bla lacI<sup>q</sup> P<sub>lac</sub>::gfp-tolA<sup>1-328</sup>-le</i>                                           | ColE1                | This work |
| pDE3   | <i>bla lacI<sup>q</sup> P<sub>lac</sub>::gfp-tolA<sup>1-60</sup>-le</i>                                            | ColE1                | This work |
| pET21  | <i>bla lacI<sup>q</sup> P<sub>T7</sub>::</i>                                                                       | ColE1                | Novagen   |

|        |                                                                                                            |                      |           |
|--------|------------------------------------------------------------------------------------------------------------|----------------------|-----------|
| pFB237 | <i>bla lacI<sup>q</sup> P<sub>lac</sub>::gfp-rodZ</i>                                                      | ColE1                | (9)       |
| pFB259 | <i>bla lacI<sup>q</sup> P<sub>lac</sub>::mreB'-linker-'mreB</i>                                            | ColE1                | (9)       |
| pFB260 | <i>bla lacI<sup>q</sup> P<sub>lac</sub>::gfp-malF<sup>2-39</sup>-rodZ<sup>139-337</sup></i>                | ColE1                | This work |
| pFB283 | <i>bla lacI<sup>q</sup> P<sub>lac</sub>::mreB'-stgfp-'mreB</i>                                             | ColE1                | This work |
| pFB291 | <i>bla lacI<sup>q</sup> P<sub>tac</sub>::rodZ</i>                                                          | ColE1                | (9)       |
| pFB310 | <i>aadA P<sub>λR</sub>:: mreB'-rfp-'mreB</i>                                                               | pSC101               | (9)       |
| pFB324 | <i>bla lacI<sup>q</sup> P<sub>tac</sub>::gfp-rodZ</i>                                                      | ColE1                | This work |
| pgalk  | <i>bla P<sub>em7</sub>::galk</i>                                                                           | ColE1                | (18)      |
| pJE102 | <i>cat repA<sup>ts</sup> ftsA<sup>R286W</sup></i>                                                          | pSC101 <sup>ts</sup> | (19)      |
| pKD13  | <i>bla aph</i>                                                                                             | R6K                  | (13)      |
| pKD46  | <i>bla repA<sup>ts</sup> araC P<sub>BAD</sub>::γ β exo</i>                                                 | pSC101 <sup>ts</sup> | (13)      |
| pKL4   | <i>bla lacI<sup>q</sup> P<sub>lac</sub>::t18-tolA</i>                                                      | ColE1                | (15)      |
| pLP7   | <i>bla lacI<sup>q</sup> P<sub>lac</sub>::t18-ponA</i>                                                      | ColE1                | (28)      |
| pLP14  | <i>bla lacI<sup>q</sup> P<sub>lac</sub>::gfp-ponA</i>                                                      | ColE1                | (28)      |
| pLP15  | <i>bla lacI<sup>q</sup> P<sub>lac</sub>::t18-malF<sup>2-39</sup>-rodZ<sup>139-337</sup></i>                | ColE1                | This work |
| pLP25  | <i>bla lacI<sup>q</sup> P<sub>lac</sub>::t18-malF<sup>2-39</sup>-rfp</i>                                   | ColE1                | This work |
| pLP26  | <i>bla lacI<sup>q</sup> P<sub>lac</sub>::t18-malF<sup>2-39</sup>-rodZ<sup>139-255</sup>-rfp</i>            | ColE1                | This work |
| pLP27  | <i>bla lacI<sup>q</sup> P<sub>tac</sub>::gfp-malF<sup>2-39</sup>-rodZ<sup>139-255</sup>-rfp</i>            | ColE1                | This work |
| pLP55  | <i>bla lacI<sup>q</sup> P<sub>tac</sub>::gfp-malF<sup>2-39</sup>-rodZ<sup>139-255</sup>-le</i>             | ColE1                | This work |
| pLP60  | <i>loxP P<sub>em7</sub>::galk aph</i>                                                                      | R6K                  | This work |
| pLP95  | <i>bla lacI<sup>q</sup> P<sub>lac</sub>::dsbA<sup>1-24</sup>-rfp-pal<sup>63-173</sup></i>                  | ColE1                | This work |
| pLP98  | <i>bla lacI<sup>q</sup> P<sub>T7</sub>::h-sumo-kck-pal<sup>63-173</sup></i>                                | ColE1                | This work |
| pLP102 | <i>bla lacI<sup>q</sup> P<sub>lac</sub>::pal<sup>1-35</sup>-rfp-pal<sup>63-173</sup></i>                   | ColE1                | This work |
| pLP112 | <i>bla lacI<sup>q</sup> P<sub>lac</sub>::pal<sup>1-35</sup>-zipA<sup>86-145</sup>-pal<sup>63-173</sup></i> | ColE1                | This work |
| pLP146 | <i>cat araC P<sub>BAD</sub>::tolQ-le</i>                                                                   | pACYC                | This work |
| pLP147 | <i>cat araC P<sub>BAD</sub>::tolQR</i>                                                                     | pACYC                | This work |
| pLP148 | <i>cat araC P<sub>BAD</sub>::tolQRA</i>                                                                    | pACYC                | This work |
| pLP225 | <i>cat araC P<sub>BAD</sub>::tolR</i>                                                                      | pACYC                | This work |
| pMG4   | <i>bla lacI<sup>q</sup> P<sub>lac</sub>::torA<sup>1-43</sup>-gfp-ftsN<sup>241-319</sup></i>                | ColE1                | (23)      |

|         |                                                                                                                                                                             |       |                  |
|---------|-----------------------------------------------------------------------------------------------------------------------------------------------------------------------------|-------|------------------|
| pMG20   | <i>cat araC</i> P <sub>BAD</sub> :: <i>torA</i> <sup>1-43</sup> - <i>bfp-ftsN</i> <sup>71-105</sup> - <i>le</i>                                                             | pACYC | (23)             |
| pMG36   | <i>bla lacI</i> <sup>q</sup> P <sub>lac</sub> :: <i>pal-rfp</i>                                                                                                             | ColE1 | (16)             |
| pMG41   | <i>bla lacI</i> <sup>q</sup> P <sub>lac</sub> :: <i>pal</i> <sup>1-35</sup> - <i>rfp</i>                                                                                    | ColE1 | This work        |
| pMG45   | <i>cat araC</i> P <sub>BAD</sub> :: <i>tolB</i>                                                                                                                             | pACYC | This work        |
| pNP2    | <i>bla lacI</i> <sup>q</sup> P <sub>lac</sub> :: <i>tolQ-gfp</i>                                                                                                            | ColE1 | (16)             |
| pNP4    | <i>bla lacI</i> <sup>q</sup> P <sub>lac</sub> :: <i>gfp-tolA</i>                                                                                                            | ColE1 | (16)             |
| pTB146  | <i>bla lacI</i> <sup>q</sup> P <sub>T7</sub> :: <i>h-sumo</i> -                                                                                                             | ColE1 | (9)              |
| pTB223  | <i>bla lacI</i> <sup>q</sup> P <sub>lac</sub> :: <i>pal-sfgfp</i>                                                                                                           | ColE1 | This work        |
| pTB225  | <i>attHK022 bla lacI</i> <sup>q</sup> P <sub>lac</sub> :: <i>zipA</i> - <i>sfgfp</i>                                                                                        | R6K   | (29)             |
| pTU136  | <i>attHK022 bla lacI</i> <sup>q</sup> P <sub>lac</sub> :: <i>dsbA</i> <sup>1-24</sup> - <i>rfp</i> -                                                                        | R6K   | (29)             |
| pTU148  | <i>attHK022 bla lacI</i> <sup>q</sup> P <sub>lac</sub> :: <i>dsbA</i> <sup>1-23</sup> - <i>rfp</i>                                                                          | R6K   | (30)             |
| pUNI10  | <i>loxP aph</i>                                                                                                                                                             | R6K   | (31)             |
| pYT11   | <i>bla lacI</i> <sup>q</sup> P <sub>tac</sub> :: <i>relA</i> <sup>1-455</sup> - <i>e</i>                                                                                    | ColE1 | (24)             |
| Phages: |                                                                                                                                                                             |       |                  |
| λDE2    | <i>imm</i> <sup>21</sup> <i>bla lacI</i> <sup>q</sup> P <sub>lac</sub> :: <i>gfp-tolA</i> <sup>1-328</sup> - <i>le</i>                                                      | λ     | This work        |
| λDE3    | <i>imm</i> <sup>21</sup> <i>bla lacI</i> <sup>q</sup> P <sub>lac</sub> :: <i>gfp-tolA</i> <sup>1-60</sup> - <i>le</i>                                                       | λ     | This work        |
| λCH483  | <i>imm</i> <sup>21</sup> <i>bla lacI</i> <sup>q</sup> P <sub>lac</sub> :: <i>gfp-tolA</i> <sup>1-111</sup> - <i>e</i>                                                       | λ     | This work        |
| λCH509  | <i>imm</i> <sup>21</sup> <i>bla lacI</i> <sup>q</sup> P <sub>lac</sub> :: <i>gfp-malF</i> <sup>2-39</sup> - <i>tolA</i> <sup>47-421</sup>                                   | λ     | This work        |
| λCH510  | <i>imm</i> <sup>21</sup> <i>bla lacI</i> <sup>q</sup> P <sub>lac</sub> :: <i>gfp-malF</i> <sup>2-39</sup> - <i>tolA</i> <sup>47-328</sup> - <i>le</i>                       | λ     | This work        |
| λCH512  | <i>imm</i> <sup>21</sup> <i>bla lacI</i> <sup>q</sup> P <sub>lac</sub> :: <i>gfp-tolA</i> <sup>1-292</sup> - <i>le</i>                                                      | λ     | This work        |
| λCH536  | <i>imm</i> <sup>21</sup> <i>bla lacI</i> <sup>q</sup> P <sub>lac</sub> :: <i>gfp-malF</i> <sup>2-39</sup> - <i>rodZ</i> <sup>139-255</sup> - <i>tolA</i> <sup>294-421</sup> | λ     | This work        |
| λCH543  | <i>imm</i> <sup>21</sup> <i>bla lacI</i> <sup>q</sup> P <sub>lac</sub> :: <i>gfp-malF</i> <sup>2-39</sup> - <i>rodZ</i> <sup>139-255</sup> - <i>e</i>                       | λ     | This work        |
| λCH549  | <i>imm</i> <sup>21</sup> <i>bla lacI</i> <sup>q</sup> P <sub>lac</sub> :: <i>gfp-malF</i> <sup>2-39</sup> - <i>tolA</i> <sup>47-292</sup> - <i>le</i>                       | λ     | This work        |
| λNP4    | <i>imm</i> <sup>21</sup> <i>bla lacI</i> <sup>q</sup> P <sub>lac</sub> :: <i>gfp-tolA</i>                                                                                   | λ     | This work        |
| λNT5    | <i>imm</i> <sup>21</sup> ' <i>bla</i> ' <i>lacZ</i>                                                                                                                         | λ     | Nancy Trun, (32) |

Genotypes indicate when constructs encode in-frame GFPmut2 (*gfp*), super-folder GFP (*sfgfp*), mCherry (*rfp*), CyaA T18-domain (*t18*), SUMO peptide (*sumo*), the peptide AEKCKEL (*kck*), hexahistidine (*h*), Leu-Glu dipeptide (*le*), and/or a single Glu residue (*e*).

## Strain construction:

Construction of strains involved P1-mediated transduction (transduction for short) (33),  $\lambda$ Red-mediated recombineering (13, 18, 21), Flp-mediated eviction of antibiotic cassettes (26), and other methods specified below or elsewhere in the text.

BL78 [*cpoB*<>*aph*] was obtained by transduction of *cpoB*<>*aph* from MG31 to TB28.

BL130 [*zipA-rfp*<sup>SW</sup> *yfeN*<>*frt*] was obtained by eviction of *aph* from CH125.

CH119 [*yfeN*<>*aph*] was obtained by transduction of *yfeN*<>*aph* from JW2399-2 to TB28.

CH120 [ $\Delta$ *galK* ( $\lambda$ c1857 *cro-bioA*<>*tetA*) *yfeN*<>*aph*] was obtained by transduction of *yfeN*<>*aph* from JW2399-2 to KG11.

For CH121/pCH279 [ $\Delta$ *galK* ( $\lambda$ c1857 *cro-bioA*<>*tetA*) *zipA*<> $P_{EM7}::galK$  *yfeN*<>*aph* /  $P_{lac}::ftsA^{R286W}$ ], the  $P_{EM7}::galK$  portion of pLP60 [ $P_{em7}::galK$  *aph*] was amplified with primers 5'-GCGCCAGCGCCGCAGCCTGTGCATTCAGCACCGCAACCGGCATCCTGTTGACAATTAATCATCGGC-3' and 5'-TACAGGCTCAGGCTGTGGTGCCGCTACGGGTTCTGCAGGCTGTCAGCACTGTCCTGCTCCTTG-3', and the 1316 bp fragment was recombined with the chromosome of CH120/pCH279. Recombinants were selected on M9 agar with 0.2% galactose, 1  $\mu$ gr/ml D-biotin, and 25  $\mu$ M IPTG at 30°C. In CH121/pCH279, a 1231 bp  $P_{EM7}::galK$  fragment replaces codons 161-164 of chromosomal *zipA*, and production of *FtsA*<sup>R286W</sup> encoded on the plasmid allows these cells to survive without *ZipA* (34).

For CH125 [*zipA-rfp*<sup>SW</sup> *yfeN*<>*aph*], the *rfp* portion of pFB310 [ $P_{\lambda R}::mreB'$ -*rfp*-*mreB*] was amplified with primers 5'-GCGCCAGCGCCGCAGCCTGTGCATTCAGCACCGCAACCGGCATCTGGCTCGAGCATGGTTTCCAAGG-3' and 5'-TACAGGCTCAGGCTGTGGTGCCGCTACGGGTTCTGCAGGCTGGCCCGGCGCGCCAGATTTGTACAG-3', and the 819 bp fragment was recombined with the chromosome of CH121/pCH279. Recombinants were selected on M9 agar with 0.2% glycerol, 1  $\mu$ gr/ml D-biotin, and 0.2% 2-deoxy-galactose (DOG) at 30°C, yielding CH123/pCH279 [ $\Delta$ *galK* ( $\lambda$ c1857 *cro-bioA*<>*tetA*) *zipA-rfp*<sup>SW</sup> *yfeN*<>*aph* /  $P_{lac}::ftsA^{R286W}$ ]. Co-transduction of *zipA-rfp*<sup>SW</sup> with *yfeN*<>*aph* from CH123/pCH279 to TB28 then yielded CH125. Strain CH125 produces a functional sandwich fusion (*ZipA-RFP*<sup>SW</sup>) in which codons

161-164 of chromosomal *zipA* have been replaced with a 735 bp fragment encoding in-frame RFP and linker peptides.

For CH128 [*zipA*<sub>-sf</sub>*gfp*<sup>SW</sup> *yfeN*<>*aph*], a portion of pCH494 [*P*<sub>T7</sub>::*zipA*<sup>1-160</sup><sub>-sf</sub>*gfp*-*zipA*<sup>165-328</sup>-*h*] was amplified with primers 5'- GTCAGCGGCCGCAACACCAGTACCAACCGCC -3' and 5'- ATCGCTCGAGGTCAAGCACGACACCGC -3', and the 1389 bp fragment was recombined with the chromosome of CH121/pCH279. Recombinants were selected on M9 agar with 0.2% glycerol, 1 µg/ml D-biotin, and 0.2% 2-deoxy-galactose (DOG) at 30°C, yielding CH127/pCH279 [ $\Delta$ *galK* ( $\lambda$ c1857 *cro*-*bioA*<>*tetA*) *zipA*<sub>-sf</sub>*gfp*<sup>SW</sup> *yfeN*<>*aph* / *P*<sub>lac</sub>::*ftsA*<sup>R286W</sup>]. Co-transduction of *zipA*<sub>-sf</sub>*gfp*<sup>SW</sup> with *yfeN*<>*aph* from CH127/pCH279 to TB28 then yielded CH128. Strain CH128 produces a functional sandwich fusion (ZipA<sub>-sf</sub>GFP<sup>SW</sup>) in which codons 161-164 of chromosomal *zipA* have been replaced with a 738 bp fragment encoding in-frame superfolder GFP and linker peptides.

CH235 [*ftsB*<sup>E56A</sup> *ftsN*<>*ftr*] was obtained by eviction of *aph* from BL173.

CH236 [*ponA*<>*ftr* (*tolQ*-*cpoB*)<>*aph*] was obtained by transduction of *tolQ*-*cpoB*<>*aph* from LP57/pLP148 to CH82.

CH237 [*ponB*<>*ftr* (*tolQ*-*cpoB*)<>*aph*] was obtained by transduction of *tolQ*-*cpoB*<>*aph* from LP57/pLP148 to LP11.

CH238 [*ftsB*<sup>E56A</sup> *tolQ*-*cpoB*<>*aph*] was obtained by transduction of *tolQ*-*cpoB*<>*aph* from LP57/pLP148 to BL167.

CH239 [*ftsB*<sup>E56A</sup> *ftsN*<>*ftr* *tolQ*-*cpoB*<>*aph*] was obtained by transduction of *tolQ*-*cpoB*<>*aph* from LP57/pLP148 to CH235.

CH241 [*zipA*-*rfp*<sup>SW</sup> *yfeN*<>*ftr* *tolQ*<>*aph*] was obtained by transduction of *tolQ*<>*aph* from JW0727-1/pLP148 to BL130.

CH242 [*zipA*-*rfp*<sup>SW</sup> *yfeN*<>*ftr* *tolA*<>*aph*] was obtained by transduction of *tolA*<>*aph* from LP49/pNP4 to BL130.

Strain KG11 [ $\Delta galK$  ( $\lambda$ c1857 *cro-bioA*<>*tetA*)] is a P1-sensitive recombineering strain allowing the facile use of *galK* as a (counter)selectable marker during chromosome engineering. We obtained the similar strain SW102 [ $\Delta galK$  ( $\lambda$ c1857 *cro-bioA*<>*tetA*)] (18) from the NCI Biological Resources Branch, but found it to be a very poor host for phage P1. As the *galK* deletion lies close to the defective  $\lambda$  prophage in this strain, the whole relevant region was transferred to wt strain TB28 in a single recombineering step. Thus, SW102 chromosomal DNA was introduced in electrocompetent cells of strain TB28/pKD46 and Tet<sup>R</sup> recombinants that were also Gal<sup>-</sup> were selected at 30°C. This yielded strain KG9 bearing plasmid pKD46. As cells harboring this defective  $\lambda$  prophage display temperature-sensitive growth, plasmid pKD46 could not be cured from KG9/pKD46 by growth at elevated temperature. Unlike SW102, however, the strain readily allowed propagation of P1, and transduction of the  $\Delta galK$  ( $\lambda$ c1857 (*cro-bioA*)<>*tetA*) region from KG9/pKD46 to TB28, again with selection for Tet<sup>R</sup> and Gal<sup>-</sup> at 30°C, finally yielded strain KG11, which itself also proved a good host for phage P1, as desired.

For LP49 [*tolA*<>*aph*], a 1385 bp *tolA*<>*aph* fragment was generated by amplifying the *aph* cassette of pKD13 using primers 5'-  
AAAGAGAGCGGGTAACAGGCGAACAGTTTTTGGAAACCGAGAATTCCGGGGATCCGTCGACC-3' and 5'-  
CCCTGATGCGCCATTGTTTTTAGTATTACCACTCCCGCGTGTAGGCTGGAGCTGCTTCG-3'. The fragment was recombined with the chromosome of TB28/pKD46, and a plasmid-free segregant was selected after growth at 37°C. In LP49, *aph* replaces bp 1190-2152 of the *ybgC-cpoB* operon, counting from the start of TolQ. The last 100 codons of *tolA*, containing putative promoters for downstream genes (35), are left intact.

For LP50 [*tolA-pal*<>*aph*], a 1387 bp *tolA-pal*<>*aph* fragment was generated by amplifying the *aph* cassette of pKD13 using primers 5'-  
AAAGAGAGCGGGTAACAGGCGAACAGTTTTTGGAAACCGAGAATTCCGGGGATCCGTCGACC-3' and 5'-  
CTGCTCATGCAATTCTCTTAGTAAACCAGTACCGCACGACGCGTGTAGGCTGGAGCTGCTTCG-3'. The fragment was recombined with the chromosome of TB28/pKD46, and a plasmid-free segregant was selected after growth at 37°C. In LP50, *aph* replaces bp 1190-4410 of the *ybgC-cpoB* operon, counting from the start of TolQ.

For LP51 [*tolR-pal*<>*aph*], a 1385 bp *tolR-pal*<>*aph* fragment was generated by amplifying the *aph* cassette of pKD13 using primers 5'-  
CAGGCGTTTACCGTTAGCGAGAGCAACAAGGGGTAAGCCAATTCCGGGGATCCGTCGACC-3' and 5'-

CTGCTCATGCAATTCTCTTAGTAAACCAGTACCGCACGACGGTGTAGGCTGGAGCTGCTTCG-3'. The fragment was recombined with the chromosome of TB28/pKD46, and a plasmid-free segregant was selected after growth at 37°C. In LP51, *aph* replaces bp 698-4410 of the *ybgC-cpoB* operon, counting from the start of TolQ.

LP53 [*tolB*<>*aph*] was obtained by transduction of *tolB*<>*aph* from JW5100-1 to TB28. In LP53, *aph* replaces bp 2591-3859 of the *ybgC-cpoB* operon, counting from the start of TolQ.

LP54 [*tolR*<>*aph*] was obtained by transduction of *tolR*<>*aph* from JW0728-1 to TB28. In LP54, *aph* replaces bp 700-1104 of the *ybgC-cpoB* operon, counting from the start of TolQ.

LP55 [*tolQ*<>*aph*] was obtained by transduction of *tolQ*<>*aph* from JW0727-1/pLP148 to TB28. In LP55, *aph* replaces bp 3-673 of the *ybgC-cpoB* operon, counting from the start of TolQ.

For LP56 [*tolQ-tolA*<>*aph*], a 1384 bp *tolQ-tolA*<>*aph* fragment was generated by amplifying the *aph* cassette of pKD13 using primers 5'-

CGTGCGCTTCCCAAGTCTATTGTTCGCGGAGTTTAAGCAGTAATTCCGGGGATCCGTCGACC-3' and 5'-  
CCCTGATGCGCCATTGTTTTTAGTATTACCACTCCCGCGTGTAGGCTGGAGCTGCTTCG-3'. The fragment was recombined with the chromosome of TB28/pKD46, and a plasmid-free segregant was selected after growth at 37°C. In LP56, *aph* replaces bp 3-2152 of the *ybgC-cpoB* operon, counting from the start of TolQ. The last 100 codons of *tolA*, containing putative promoters for downstream genes (35), are left intact.

For LP57 [*tolQ-cpoB*<>*aph*], a 1385 bp *tolQ-cpoB*<>*aph* fragment was generated by amplifying the *aph* cassette of pKD13 using primers 5'-

CGTGCGCTTCCCAAGTCTATTGTTCGCGGAGTTTAAGCAGTAATTCCGGGGATCCGTCGACC-3' and 5'-  
CACGACACGACCAGAAATAATGCGACTTCTGGTCGTGTGTTTGTAGGCTGGAGCTGCTTCG-3'. The fragment was recombined with the chromosome of TB28/pKD46, and a plasmid-free segregant was selected after growth at 37°C. In LP57, *aph* replaces bp 3-5242 of the *ybgC-cpoB* operon, counting from the start of TolQ.

For LP58 [*tolQ-tolR*<>*aph*], a 1394 bp *tolQ-tolR*<>*aph* fragment was generated by amplifying the *aph* cassette of pKD13 using primers 5'-

CGTGCGCTTCCCAAGTCTATTGTTCGCGGAGTTTAAGCAGTAATTCCGGGGATCCGTCGACC-3' and 5'-

TCTCTTTCAAGCAAGGGAAACGCAGATGTTTAGATAGGCTGCGTCATTAATGTAGGCTGGAGCTGCTTCG-3'.

The fragment was recombined with the chromosome of TB28/pKD46, and a plasmid-free segregant was selected after growth at 37°C. In LP58, *aph* replaces bp 3-1104 of the *ybgC-ybgF* operon, counting from the start of TolQ.

For MG24 [*tolB-pal<>aph*], a 1385 bp *tolB-pal<>aph* fragment was generated by amplifying the *aph* cassette of pKD13 using primers 5'-

ATTTTAGTTTGTTAACATTCTGCTAAATTATCGTGGGCCAATTCGGGGATCCGTCGACC-3' and 5'-

CTGCTCATGCAATTCTCTTAGTAAACCAGTACCGCACGACGGTGTAGGCTGGAGCTGCTTCG-3'. The

fragment was recombined with the chromosome of TB28/pKD46, and a plasmid-free segregant was selected after growth at 37°C. In MG24, *aph* replaces bp 2565-4410 of the *ybgC-ybgF* operon, counting from the start of TolQ.

For MG28 [*nadA::Tn10 gal490 λcl857 Δ(cro-bioA) cpoB<>aph*], a 1385 bp *cpoB<>aph* fragment was generated by amplifying the *aph* cassette of pKD13 using primers 5'-

ATGAGCAGTAACTTCAGACATCAACTATTGAGTCTGTCGTAATTCGGGGATCCGTCGACC-3' and 5'-

CACGACACGACCAGAAATAATGCGACTTCTGGTCGTGTGTTTGTAGGCTGGAGCTGCTTCG-3', and the

fragment was recombined with the chromosome of TB10. In MG28, *aph* replaces bp 4486-5242 of the *ybgC-cpoB* operon, counting from the start of TolQ.

MG31 [*nadA::Tn10 gal490 λcl857 Δ(cro-bioA) cpoB<>aph*] was obtained by transduction of *cpoB<>aph* from MG28 to TB28. Further analyses revealed that the additional nearby markers [*nadA::Tn10 gal490 λcl857 Δ(cro-bioA)*] had unintentionally co-transduced with *cpoB<>aph* in this strain.

### **Plasmid construction:**

Unless indicated otherwise, MG1655 or TB28 chromosomal DNA was used as template in amplification reactions. Sites of interest (e.g. relevant restriction sites, those allowing for targeted recombination, or site-directed mutations) are underlined in primer sequences. When plasmid construction involved PCR amplification and/or mutagenesis, the nucleotide sequence of the plasmid insert was verified.

For pBL74 [ $P_{lac}::dsbA^{1-24}-rfp-cwIC^{181-255}$ ], the 229 bp *Bam*HI-*Hind*III fragment of pBL34 [ $torA^{1-43}-gfp-cwIC^{181-255}$ ] was used to replace the 18 bp *Bam*HI-*Hind*III fragment of pTU136 [ $P_{lac}::dsbA^{1-24}-rfp-$ ].

For pBL75 [ $P_{lac}::dsbA^{1-24}-rfp-cwIC^{181-255}$ ], the 1075 bp *Xba*I-*Hind*III fragment of pBL74 [ $P_{lac}::dsbA^{1-24}-rfp-cwIC^{181-255}$ ] was used to replace the 1746 bp *Xba*I-*Hind*III fragment of pCH201 [ $P_{lac}::gfp-ftsM$ ].

For pBL126 [ $P_{lac}::cpoB-rfp$ ], a *cpoB* fragment was amplified with primers 5'-GGTCTCTAGACTGGTTTACTAAGAGAATTGC -3' and 5'-CTACCTCGAGCATCGCGTTCAGACGTTTTTGTGC-3' and the 816 bp *Xba*I-*Xho*I fragment was used to replace the 584 bp *Xba*I-*Xho*I fragment of pMG36 [ $P_{lac}::pal-rfp$ ].

For pBL134 [ $P_{lac}::cpoB$ ], a portion of pBL126 [ $P_{lac}::cpoB-rfp$ ] was amplified with primers 5'-GGTCTCTAGACTGGTTTACTAAGAGAATTGC-3' and 5'-AGTAAAGCTTATGATTCGCACGACACGACCAG-3', and the 873 bp *Xba*I-*Hind*III fragment was used to replace the 1557 bp *Xba*I-*Hind*III fragment of pBL126 itself.

Plasmid pBSK-GS42810 [ $_{sf}gfp$ ] was custom ordered from Epoch Life Science Inc. and was produced by inserting a 762 bp synthetic fragment encoding a codon-optimized version of super-folder GFP into the *Sma*I site of pBluescript II SK(+) (Stratagene).

For pCH279 [ $P_{lac}::ftsA^{R286W}$ ], the 728 bp *Bgl*II-*Hind*III fragment of pDB297 [ $P_{lac}::ftsA$ ] was replaced with that of pJE102 [ $ftsQ ftsA^{R286W} ftsZ$ ].

For pCH421 [ $P_{lac}::gfp-malF^{2-39}-rodZ^{139-337}$ ], the 1282 bp *Xba*I-*Sal*I fragment of pFB324 [ $P_{lac}::gfp-rodZ$ ] was replaced with the 988 bp *Xba*I-*Sal*I fragment of pFB260 [ $P_{lac}::gfp-malF^{2-39}-rodZ^{139-337}$ ].

For pCH455 [ $P_{lac}::pal^{1-35}-rfp-$ ], the 7809 bp *Xho*I-*Hind*III fragment of pMG41 [ $P_{lac}::pal^{1-35}-rfp$ ] was ligated to the 750 bp *Xho*I-*Hind*III fragment of pTU136 [ $P_{lac}::dsbA^{1-24}-rfp-$ ].

For pCH480 [ $P_{lac}::t18-toIA^{1-111}-e$ ], a portion of pKL4 [ $P_{lac}::t18-toIA$ ] was amplified with primers 5'-ACGTTCTGAAGTTCTCGCC -3' and 5'-CGCCCTCGAGCCGCTCTTTCTCAAGTTGCTTCAG -3', and the 458 bp *Xba*I-*Xho*I fragment of the product was used to replace the 181 bp *Xba*I-*Xho*I fragment of pBL169 [ $P_{lac}::t18-dedD^{1-54}-le$ ].

For pCH483 [ $P_{lac}::gfp-tolA^{1-111}-e$ ], the 352 bp *SfiI* fragment of pCH480 [ $P_{lac}::t18-tolA^{1-111}-e$ ] was used to replace the 2566 bp *SfiI* fragment of pLP14 [ $P_{lac}::gfp-ponA$ ].

For pCH491 [ $P_{T7}::zipA^{1-160}-rfp-zipA^{165-328}-h$ ], the chromosomal *zipA-rfp<sup>SW</sup>* allele of strain CH125 [*zipA-rfp<sup>SW</sup> yfeN<>aph*] was amplified with primers 5'- ACAGAGATCCATATGATGCAGGATTTGCGTCTG - 3' and 5'- AAGTGTCGACGGCGTTGGCGTCTTTGAC -3', and treated with *NdeI* and *SaI*. The resulting 1709 bp fragment was next used to replace the 77 bp *NdeI-XhoI* fragment of pET21b [ $P_{T7}::$ ].

For pCH494 [ $P_{T7}::zipA^{1-160}-_{st}gfp-zipA^{165-328}-h$ ], the 722 bp *XhoI-Ascl* fragment of pFB283 [ $P_{lac}::mreB'-_{st}gfp-mreB$ ] was used to replace the 719 bp *XhoI-Ascl* fragment of pCH491 [ $P_{T7}::zipA^{1-160}-rfp-zipA^{165-328}-h$ ].

For pCH495 [ $P_{lac}::t18-tolA^{294-421}$ ], a portion of pKL4 [ $P_{lac}::t18-tolA$ ] was amplified with primers 5'- CCGGGGCCATTACGGCCGATGATATTTTCGGTGAGCTAAGC -3' and 5'- GTCAGGCCGAGGCGGCCCTTACGGTTTGAAGTCCAATGG -3', and the 397 bp *SfiI* fragment of the product was used to replace the 2565 bp *SfiI* fragment of pLP7 [ $P_{lac}::t18-ponA$ ].

For pCH502 [ $P_{lac}::t18-tolA^{47-421}$ ], a portion of pKL4 [ $P_{lac}::t18-tolA$ ] was amplified with primers 5'- TTTAGGCCATTACGGCCGGTTCGTCCATCGACGCTGTCATGG -3' and 5'- GTCAGGCCGAGGCGGCCCTTACGGTTTGAAGTCCAATGG -3', and the 1141 bp *SfiI* fragment of the product was used to replace the 2565 bp *SfiI* fragment of pLP7 [ $P_{lac}::t18-ponA$ ].

For pCH506 [ $P_{T7}::h-sumo-kck-tolA^{47-421}$ ], the 349 bp *SfiI* fragment of pLP98 [ $P_{T7}::h-sumo-kck-pal^{63-173}$ ] was replaced with the 1141 bp *SfiI* fragment of pCH502 [ $P_{lac}::t18-tolA^{47-421}$ ].

To create pCH508 [ $P_{lac}::gfp-malF^{2-39}-$ ], oligo's 5'- GATCGGCCATTACGGCCTAAGGCCGCTCGGCCAG -3' and 5'- TCGACTGGCCGAGGCGGCCTTAGGCCGTAATGGCC -3' were annealed and the resulting fragment with *BamHI* and *SaI* overhangs, and containing two distinct *SfiI* sites, was used to replace the 216 bp *BamHI-SaI* fragment of pCH310 [ $P_{lac}::gfp-malF^{2-39}-ftsN^{55-123}$ ].

For pCH509 [ $P_{lac}::gfp-t-malF^{2-39}-tolA^{47-421}$ ], the 16 bp *SfiI* fragment of pCH508 [ $P_{lac}::gfp-malF^{2-39}-$ ] was replaced with the 1141 bp *SfiI* fragment of pCH502 [ $P_{lac}::t18-tolA^{47-421}$ ].

For pCH510 [ $P_{lac}::gfp-malF^{2-39}-tolA^{47-328}-le$ ], the 973 bp *XbaI-SphI* fragment of pCH509 [ $P_{lac}::gfp-t-malF^{2-39}-tolA^{47-421}$ ] was used to replace the 979 bp *XbaI-SphI* fragment of pDE2 [ $P_{lac}::gfp-tolA^{1-328}-le$ ].

Plasmid pCH511 [ $P_{T7}::h-sumo-kck-tolA^{47-292}-h$ ], was obtained by deletion of the 425 *NotI* fragment from pCH506 [ $P_{T7}::h-sumo-kck-tolA^{47-421}$ ].

For pCH512 [ $P_{lac}::gfp-tolA^{1-292}-le$ ], the 676 bp *SphI-XhoI* fragment of pCH511 [ $P_{T7}::h-sumo-kck-tolA^{47-292}-h$ ] was used to replace the 784 bp *SphI-XhoI* fragment of pDE2 [ $P_{lac}::gfp-tolA^{1-328}-le$ ].

For pCH515 [ $P_{T7}::tolQ-h$ ], a portion of pNP2 [ $P_{lac}::tolQ-gfp$ ] was amplified with primers 5'-TGCACATATGACTGACATGAATATCCTTG-3' and 5'-CCTGCTCGAGCCCCTTGTTGCTCTCGCTA-3', and the 692 bp *NdeI-XhoI* fragment of the product was used to replace the 77 bp *NdeI-XhoI* fragment of pET21b [ $P_{T7}::$ ].

For pCH516 [ $P_{lac}::tolQ-gfp$ ], the 1026 bp *XbaI-XhoI* fragment of pCH151 [ $P_{lac}::zipA-gfp$ ] was replaced with the 732 bp *XbaI-XhoI* fragment of pCH515.

For pCH518 [ $P_{BAD}::tolB\ pal$ ], the *tolB* and *pal* genes were amplified with primers 5'-TGTGTCTAGACCATCGGTCCAGATAAGGGAGATATG-3' and 5'-GCTGAAGCTTGTCTGACTGGCCGAGGCGGCCTTAGTAAACCAGTACCGCACGACGG-3', and the 1130 bp *ApaLI-HinDIII* fragment of the product was used to replace the 557 bp *ApaLI-HinDIII* fragment of pMG45 [ $P_{BAD}::tolB$ ].

For pCH519 [ $P_{lac}::dsbA^{1-24}-rfp-tolA^{294-421}$ ], the 349 bp *SfiI* fragment of pLP95 [ $P_{lac}::dsbA^{1-24}-rfp-pal^{63-173}$ ] was replaced with the 397 bp *SfiI* fragment of pCH495 [ $P_{lac}::t18-tolA^{294-421}$ ].

For pCH520 [ $P_{lac}::torA^{1-43}-gfp-tolA^{294-421}$ ], the 1580 bp *ApaI-BamHI* fragment of pCH519 [ $P_{lac}::dsbA^{1-24}-rfp-tolA^{294-421}$ ] was replaced with the 1562 bp *ApaI-BamHI* fragment of pMG4 [ $P_{lac}::torA^{1-43}-gfp-ftsN^{241-319}$ ].

For pCH522 [ $P_{BAD}::tolB\ pal-sf-gfp$ ], the 869 bp *SbfI-HinDIII* fragment of pTB223 [ $P_{lac}::pal-sf-gfp$ ] was used to replace the 142 bp *SbfI-HinDIII* fragment of pCH518 [ $P_{BAD}::tolB\ pal$ ].

For pCH525 [ $P_{BAD}::pal$ ], the 465 bp *XbaI*-*SbfI* fragment of pTB223 [ $P_{lac}::pal$ -*sf**gfp*] was used to replace the 1759 bp *XbaI*-*SbfI* fragment of pCH518 [ $P_{BAD}::tolB$  *pal*].

For pCH528 [ $P_{BAD}::tolB$  *pal* *cpoB*], the *pal* and *cpoB* genes were amplified with primers 5'-TACGGCTAGCGGCATGTTCTTCCAACAAGAACGCC -3' and 5'-AGTAAAGCTTATGATTTCGACGACACGACCAG -3', and the 977 bp *SbfI*-*HinDIII* fragment of the product was used to replace the 869 bp *SbfI*-*HinDIII* fragment of pCH522 [ $P_{BAD}::tolB$  *pal*-*sf**gfp*].

For pCH535 [ $P_{lac}::gfp$ -*malF*<sup>2-39</sup>-*tolA*<sup>294-421</sup>], a portion of pCH520 [ $P_{lac}::torA<sup>1-43</sup>-*gfp*-*tolA*<sup>294-421</sup>] was amplified with primers 5'-ACTGGATCCCTCGAGGCCATTACGGCCGATGATATTTTCGG -3' and 5'-AAAGGGGGATGTGCTGCAAG -3', and the 428 bp *BamHI*-*HinDIII* fragment of the product was used to replace the 230 bp *BamHI*-*HinDIII* fragment of pCH310 [ $P_{lac}::gfp$ -*malF*<sup>2-39</sup>-*ftsN*<sup>55-123</sup>].$

For pCH536 [ $P_{lac}::gfp$ -*malF*<sup>2-39</sup>-*rodZ*<sup>139-255</sup>-*tolA*<sup>294-421</sup>], the 1247 bp *XbaI*-*XhoI* fragment of pLP55 [ $P_{tac}::gfp$ -*malF*<sup>2-39</sup>-*rodZ*<sup>139-255</sup>-*le*] was used to replace the 899 bp *XbaI*-*XhoI* fragment of pCH535 [ $P_{lac}::gfp$ -*malF*<sup>2-39</sup>-*tolA*<sup>294-421</sup>].

For pCH537 [ $P_{lac}::gfp$ -*malF*<sup>2-39</sup>-*zipA*<sup>86-145</sup>-*pal*<sup>63-173</sup>], the 563 bp *XhoI*-*HinDIII* fragment of pLP112 [ $P_{lac}::pal<sup>1-35</sup>-*zipA*<sup>86-145</sup>-*pal*<sup>63-173</sup>] was used to replace the 422 bp *XhoI*-*HinDIII* fragment of pCH535 [ $P_{lac}::gfp$ -*malF*<sup>2-39</sup>-*tolA*<sup>294-421</sup>].$

For pCH538 [ $P_{lac}::gfp$ -*malF*<sup>2-39</sup>-*zipA*<sup>86-145</sup>-*tolA*<sup>294-421</sup>], the 349 bp *SfiI* fragment of pCH537 [ $P_{lac}::gfp$ -*malF*<sup>2-39</sup>-*zipA*<sup>86-145</sup>-*pal*<sup>63-173</sup>] was replaced with the 396 bp *SfiI* fragment of pCH520 [ $P_{lac}::torA<sup>1-43</sup>-*gfp*-*tolA*<sup>294-421</sup>].$

For pCH543 [ $P_{lac}::gfp$ -*malF*<sup>2-39</sup>-*rodZ*<sup>139-255</sup>-*e*], the 1655 bp *XbaI*-*XhoI* fragment of pCH512 [ $P_{lac}::gfp$ -*tolA*<sup>1-292</sup>-*le*] was replaced with the 1247 bp *XbaI*-*XhoI* fragment of pCH536 [ $P_{lac}::gfp$ -*malF*<sup>2-39</sup>-*rodZ*<sup>139-255</sup>-*tolA*<sup>294-421</sup>].

To obtain pCH544 [ $P_{BAD}::tolB$  *pal*<sup>0</sup> *cpoB*], pCH528 [ $P_{BAD}::tolB$  *pal* *cpoB*] was linearized with *PciI*, treated with Klenow and dNTP's, and recircularized. This caused the insertion of an extra 4 nt (CATG), the creation of a new *NsiI* site, and a frameshift at codon 53 of the *pal* ORF. Hence, the *pal*<sup>0</sup> allele on this plasmid encodes a peptide consisting of the first 52 residues of Pal (31 residues

after maturation), followed by the nonsense residues  
HVFRRAGSSANATAAAEQHLLRSGQVRYPF.

For pCH545 [ $P_{BAD}::pal\ cpoB$ ], the 1204 bp *Afl*III-*Sph*I fragment of pCH525 [ $P_{BAD}::pal$ ] was used to replace the 2498 bp *Afl*III-*Sph*I fragment of pCH528 [ $P_{BAD}::tolB\ pal\ cpoB$ ].

For pCH546 [ $P_{BAD}::cpoB$ ], the 873 bp *Xba*I-*Hin*DIII fragment of pBL134 [ $P_{lac}::cpoB$ ] was used to replace the 2736 bp *Xba*I-*Hin*DIII fragment of pCH528 [ $P_{BAD}::tolB\ pal\ cpoB$ ].

For pCH549 [ $P_{lac}::gfp-malF^{2-39}-tolA^{47-292}-le$ ], the 979 bp *Xba*I-*Sph*I fragment of pCH512 [ $P_{lac}::gfp-tolA^{1-292}-le$ ] was replaced with the 973 bp *Xba*I-*Sph*I fragment of pCH509 [ $P_{lac}::gfp-malF^{2-39}-tolA^{47-421}$ ].

For pCH555 [ $P_{BAD}::tolA$ ], *tolA* was amplified with primers 5'-GGCGTCTAGAGCGGGTAACAGGCGAACAGTTTTTGG-3' and 5'-CGACGTCGACTTACGGTTTGAAGTCCAATGGCGCG-3', and the 1307 bp *Xba*I-*Sal*I fragment of the product was used to replace the 1026 bp *Xba*I-*Sal*I fragment of pMG20 [ $P_{BAD}::torA^{1-43}-bfp-ftsN^{71-105}-le$ ].

For pCH633 [ $P_{BAD}::tolQ-gfp$ ], the 24 bp *Xba*I-*Hin*DIII fragment of pBAD33 [ $P_{BAD}::$ ] was replaced with the 1495 bp *Xba*I-*Hin*DIII fragment of pCH516 [ $P_{lac}::tolQ-gfp$ ].

For pCH634 [ $P_{BAD}::gfp-tolA$ ], the 6 bp *Xba*I-*Sal*I fragment of pBAD33 [ $P_{BAD}::$ ] was replaced with the 2045 bp *Xba*I-*Sal*I fragment of pNP4 [ $P_{lac}::gfp-tolA$ ].

For pCS7 [ $P_{T7}::h-sumo-kck-$ ], a portion of pTB146 [ $P_{T7}::h-sumo-$ ] was amplified with primers 5'-GATCCCGCGAAATTAATACGACTCACTATAGGGG-3' and 5'-CCGCAAGCTTGGAGCTCTTTGCATTTTCCGCACCACCAATCTGTTCTCTG-3', and the 393 bp *Xba*I-*Sac*I fragment of the product was used to replace the 94 bp *Xba*I-*Sac*I fragment of pET21a [ $P_{T7}::$ ]. The KCK-tag consists of seven residues (AEKCKEL) that immediately follow the SUMO-tag.

For pDE2 [ $P_{lac}::gfp-tolA^{1-328}-le$ ], a portion of pNP4 [ $P_{lac}::gfp-tolA$ ] was amplified with primers 5'-GCTGCTGGGATTACACATGGC-3' and 5'-ATTTCTCGAGTTTAGTATTACCACTCCCGGCAGG-3', and the

1023 bp *NheI*-*XhoI* fragment was used to replace the 1119 bp *NheI*-*XhoI* fragment of pCH181 [*P<sub>lac</sub>::gfp-minD minE<sup>K88E</sup>*].

For pDE3 [*P<sub>lac</sub>::gfp-tolA<sup>1-60</sup>-le*], a portion of pNP4 [*P<sub>lac</sub>::gfp-tolA*] was amplified with primers 5'-GCTGCTGGGATTACACATGGC-3' and 5'-ACTGCTCGAGTACCGCACCTGAATCAACCATGAC-3', and the 219 bp *NheI*-*XhoI* fragment was used to replace the 1119 bp *NheI*-*XhoI* fragment of pCH181 [*P<sub>lac</sub>::gfp-minD minE<sup>K88E</sup>*].

For pFB260 [*P<sub>lac</sub>::gfp-malF<sup>2-39</sup>-rodZ<sup>139-337</sup>*], a portion of pFB237 [*P<sub>lac</sub>::gfp-rodZ*] was amplified with primers 5'-CGGGATCCCAGCAGGAAGAGATCACCCTATGGCCG-3' and 5'-CCGCTCGAGTTACTGCGCCGGTGATTGTTTCGGC-3', and the 606 bp *Bam*HI-*XhoI* fragment was used to replace the 207 bp *Bam*HI-*XhoI* fragment of pCH310 [*P<sub>lac</sub>::gfp-malF<sup>2-39</sup>-ftsN<sup>55-123</sup>*].

For pFB283 [*P<sub>lac</sub>::mreB'-sf-gfp-mreB*], *sf-gfp* was amplified from pTB225 [*P<sub>lac</sub>::zipA-sf-gfp*] with primers 5'-GCCGCTCGAGCATGTCTAAAGGTGAAGAACTGTTCCACCG-3' and 5'-CCCGGCGCGCCTTTGTAGAGCTCATCCATGCCG-3', and treated with *XhoI* and *Ascl*. The resulting 722 bp fragment was next used to replace the 17 bp *XhoI*-*Ascl* fragment of pFB259 [*P<sub>lac</sub>::mreB'-linker-mreB*].

For pFB324 [*P<sub>tac</sub>::gfp-rodZ*], the 1076 bp *XbaI*-*Hind*III fragment of pFB291 [*P<sub>tac</sub>::rodZ*] was replaced with the 1793 bp *XbaI*-*Hind*III fragment of pFB237 [*P<sub>lac</sub>::gfp-rodZ*].

For pLP15 [*P<sub>lac</sub>::t18-malF<sup>2-39</sup>-rodZ<sup>139-337</sup>*], a portion of pCH364 [*P<sub>lac</sub>::t18-lacZ*] was amplified with primers 5'-CCGTGAATTCTGCCGCCAGCGAGGCCACGGGC-3' and 5'-TGCGGCTAGCGGTTCCACTGCGCCCAGCGACGG-3', and the 532 bp *Eco*RI-*NheI* fragment was used to replace the 816 bp *Eco*RI-*NheI* fragment of pFB260 [*P<sub>lac</sub>::gfp-malF<sup>2-39</sup>-rodZ<sup>139-337</sup>*].

For pLP25 [*P<sub>lac</sub>::t18-malF<sup>2-39</sup>-rfp*], the 615 bp *Bam*HI-*Sall* fragment of pLP15 [*P<sub>lac</sub>::t18-malF<sup>2-39</sup>-rodZ<sup>139-337</sup>*] was replaced with the 764 bp *Bam*HI-*Sall* fragment of pTU148 [*P<sub>lac</sub>::dsbA<sup>1-23</sup>-rfp*].

For pLP26 [*P<sub>lac</sub>::t18-malF<sup>2-39</sup>-rodZ<sup>139-255</sup>-rfp*], a portion of pLP15 [*P<sub>lac</sub>::t18-malF<sup>2-39</sup>-rodZ<sup>139-337</sup>*] was amplified with primers 5'-CGGGATCCCAGCAGGAAGAGATCACCCTATGGCCG-3' and 5'-GCACCTCGAGCGCATTCGGATCAGCCACCGGCGTGG-3', and the 353 bp *Bam*HI-*XhoI* fragment was used to replace the 12 bp *Bam*HI-*XhoI* fragment of pLP25 [*P<sub>lac</sub>::t18-malF<sup>2-39</sup>-rfp*].

For pLP27 [ $P_{tac}::gfp-malF^{2-39}-rodZ^{139-255}-rfp$ ], the 1121 bp *Bam*HI-*Hind*III fragment of pLP26 [ $P_{lac}::t18-malF^{2-39}-rodZ^{139-255}-rfp$ ] was used to replace the 606 bp *Bam*HI-*Hind*III fragment of pCH421 [ $P_{tac}::gfp-malF^{2-39}-rodZ^{139-337}$ ].

For pLP55 [ $P_{tac}::gfp-malF^{2-39}-rodZ^{139-255}-le$ ], the 1401 bp *Xba*I-*Xho*I fragment of pYT11 [ $P_{tac}::relA^{1-455}-e$ ] was replaced with the 1247 bp *Xba*I-*Xho*I fragment of pLP27 [ $P_{tac}::gfp-malF^{2-39}-rodZ^{139-255}-rfp$ ].

For pLP60 [ $P_{em7}::galk$ ], the 1248 bp *Eco*RI-*Xba*I fragment of *pgalk* was used to replace the 298 bp *Eco*RI-*Xba*I fragment of pUNI10.

For pLP95 [ $P_{lac}::dsbA^{1-24}-rfp-pal^{63-173}$ ], a portion of pMG36 [ $P_{lac}::pal-rfp$ ] was amplified with primers 5'- GGCTGGATCCTCGGCCATTACGGCCCAACAGCTGCAGCAGAACAACATCG-3' and 5'- GCTGAAGCTTGTCTGACTGGCCGAGGCGGCCTTAGTAAACCAGTACCGCACGACGG-3', and the 377 bp *Bam*HI-*Hin*DIII fragment was used to replace the 229 bp *Bam*HI-*Hin*DIII fragment of pBL75 [ $P_{lac}::dsbA^{1-24}-rfp-cwIC^{181-255}$ ].

For pLP98 [ $P_{T7}::h-sumo-kck-pal^{63-173}$ ], a portion of pLP95 [ $P_{lac}::dsbA^{1-24}-rfp-pal^{63-173}$ ] was amplified with primers 5'- GGCTGAGCTCTCGGCCATTACGGCCCAACAG-3' and 5'- GCTGAAGCTTGTCTGACTGGCCGAGGCGGCCTTAGTAAACCAGTACCGCACGACGG-3', and the 373 bp *Sac*I-*Hin*DIII fragment was used to replace the 9 bp *Sac*I-*Hin*DIII fragment of pCS7 [ $P_{T7}::h-sumo-kck$ ].

For pLP102 [ $P_{lac}::pal^{1-35}-rfp-pal^{63-173}$ ], the 978 bp *Eco*RI-*Bam*HI fragment of pCH455 [ $P_{lac}::pal^{1-35}-rfp$ ] was used to replace the 922 bp *Eco*RI-*Bam*HI fragment of pLP95 [ $P_{lac}::dsbA^{1-24}-rfp-pal^{63-173}$ ].

To create pLP112 [ $P_{lac}::pal^{1-35}-zipA^{86-145}-pal^{63-173}$ ], a portion of pCH151 [ $P_{lac}::zipA-gfp$ ] was amplified with primers 5'- CCGCTCGAGCCGTCGCCGAACACCAG-3' and 5'- CGGGATCCCTGTGGCGAACTGGCTGCTGC-3', and the 186 bp *Xho*I-*Bam*HI fragment was used to replace the 732 bp *Xho*I-*Bam*HI fragment of pLP102 [ $P_{lac}::pal^{1-35}-rfp-pal^{63-173}$ ].

For pLP146 [ $P_{BAD}::tolQ-le$ ], the 744 bp *Xba*I-*Xho*I fragment of pNP2 [ $P_{lac}::tolQ-gfp$ ] was used to replace the 1017 bp *Xba*I-*Xho*I fragment of pMG20 [ $P_{BAD}::torA^{1-43}-bfp-ftsN^{71-105}-le$ ].

For pLP147 [ $P_{BAD}::tolQR$ ], a *tolQR* fragment was amplified with primers 5'-  
CCTGTCTAGAAATGAAGCCTCGTGCCTTCC -3' and 5'-  
CGATGTCGACTTAGATAGGCTGCGTCATTAAACCAAC -3', and the 1178 bp *XbaI-SalI* fragment was  
used to replace the 1026 bp *XbaI-SalI* fragment of pMG20 [ $P_{BAD}::torA^{1-43}-bfp-ftsN^{71-105}-le$ ].

For pLP148 [ $P_{BAD}::tolQRA$ ], a *tolQRA* fragment was amplified with primers 5'-  
CCTGTCTAGAAATGAAGCCTCGTGCCTTCC -3' and 5'-  
CGACGTCGACTTACGGTTTGAAGTCCAATGGCGCG -3', and the 2509 bp *XbaI-SalI* fragment was used  
to replace the 1026 bp *XbaI-SalI* fragment of pMG20 [ $P_{BAD}::torA^{1-43}-bfp-ftsN^{71-105}-le$ ].

For pLP225 [ $P_{BAD}::tolR$ ], a portion of pLP148 [ $P_{BAD}::tolQRA$ ] was amplified with primers 5'-  
TTGTCTAGAGTTTACCGCGATTCTGCAC-3' and 5'- CGATGTCGACTTAGATAGGCTGCGTCATTAAACCAAC-  
3', and the 496 bp *XbaI-SalI* fragment was used to replace the 1026 bp *XbaI-SalI* fragment of  
pMG20 [ $P_{BAD}::torA^{1-43}-bfp-ftsN^{71-105}-le$ ].

For pMG41 [ $P_{lac}::pal^{1-35}-rfp$ ], a portion of pMG36 [ $P_{lac}::pal-rfp$ ] was amplified with primers 5'-  
TCCCTCTAGACCCTGCCTGGTCGCCGTATCTGTG-3' and 5'-  
TCAGCTCGAGGCCTTCGCTGCCGTCATTGCTGGC-3', and the 170 bp *XbaI-XhoI* fragment was used to  
replace the 1026 bp *XbaI-XhoI* fragment of pCH311 [ $P_{lac}::zipA-rfp$ ].

For pMG45 [ $P_{BAD}::tolB$ ], *tolB* was amplified with primers 5'-  
TGTGTCTAGACCATCGGTCCAGATAAGGGAGATATG-3' and 5'-  
GTCGAAGCTTTTATCACAGATACGGCGACCAGG-3', and the 1328 bp *XbaI-HindIII* fragment was used to  
replace the 24 bp *XbaI-HindIII* fragment of pBAD33 [ $P_{BAD}::$ ].

For pTB223 [ $P_{lac}::pal-sfgfp$ ], the 741 bp *XhoI-HindIII* fragment of pMG36 [ $P_{lac}::pal-rfp$ ] was  
replaced with the 750 bp *XhoI-HindIII* fragment of pBSK-GS42810 [ $sfgfp$ ].

### Phage construction:

Lysogenic phages  $\lambda$ DE2 [ $P_{lac}::gfp-tolA^{1-328}-le$ ],  $\lambda$ DE3 [ $P_{lac}::gfp-tolA^{1-60}-le$ ],  $\lambda$ CH483 [ $P_{lac}::gfp-tolA^{1-111}-le$ ],  $\lambda$ CH509 [ $P_{lac}::gfp-malF^{2-39}-tolA^{47-421}$ ],  $\lambda$ CH510 [ $P_{lac}::gfp-malF^{2-39}-tolA^{47-328}-le$ ],  $\lambda$ CH512 [ $P_{lac}::gfp-tolA^{1-292}-le$ ],  $\lambda$ CH536 [ $P_{lac}::gfp-malF^{2-39}-rodZ^{139-255}-tolA^{294-421}$ ],  $\lambda$ CH543 [ $P_{lac}::gfp-malF^{2-39}-$

*rodZ*<sup>139-255</sup>-e],  $\lambda$ CH549 [*P*<sub>lac</sub>::*gfp-malF*<sup>2-39</sup>-*tolA*<sup>47-292</sup>-*le*], and  $\lambda$ NP4 [*P*<sub>lac</sub>::*gfp-tolA*] were obtained by crossing the relevant inserts of pDE2, pDE3, pCH483, pCH509, pCH510, pCH512, pCH536, pCH543, pCH549, and pNP4, respectively, onto  $\lambda$ NT5 [*imm*<sup>21</sup> *'bla 'lacZ*] (32).

#### Supplemental references:

1. Altenhoff AM, Train CM, Gilbert KJ, Mediratta I, Mendes de Farias T, Moi D, Nevers Y, Radoykova HS, Rossier V, Warwick Vesztröcy A, Glover NM, Dessimoz C. 2021. OMA orthology in 2021: website overhaul, conserved isoforms, ancestral gene order and more. *Nucleic Acids Res* 49:D373-D379.
2. Hale CA, Rhee AC, de Boer PAJ. 2000. ZipA-induced bundling of FtsZ polymers mediated by an interaction between C-terminal domains. *J Bacteriol* 182:5153-5166.
3. Hale CA, de Boer PAJ. 1997. Direct binding of FtsZ to ZipA, an essential component of the septal ring structure that mediates cell division in *E.coli*. *Cell* 88:175-185.
4. Lomize AL, Lomize MA, Krolicki SR, Pogozheva ID. 2017. Membranome: a database for proteome-wide analysis of single-pass membrane proteins. *Nucleic Acids Res* 45:D250-D255.
5. Ohashi T, Hale CA, De Boer PA, Erickson HP. 2002. Structural Evidence that the P/Q Domain of ZipA Is an Unstructured, Flexible Tether between the Membrane and the C-Terminal FtsZ-Binding Domain. *J Bacteriol* 184:4313-4315.
6. Mosyak L, Zhang Y, Glasfeld E, Haney S, Stahl M, Seehra J, Somers WS. 2000. The bacterial cell-division protein ZipA and its interaction with an FtsZ fragment revealed by X-ray crystallography. *EMBO J* 19:3179-3191.
7. Levengood SK, Beyer WF, Jr., Webster RE. 1991. TolA: a membrane protein involved in colicin uptake contains an extended helical region. *Proc Natl Acad Sci U S A* 88:5939-5943.
8. Oldham ML, Khare D, Quijcho FA, Davidson AL, Chen J. 2007. Crystal structure of a catalytic intermediate of the maltose transporter. *Nature* 450:515-521.
9. Bendezu FO, Hale CA, Bernhardt TG, de Boer PA. 2009. RodZ (YfgA) is required for proper assembly of the MreB actin cytoskeleton and cell shape in *E.coli*. *EMBO J* 28:193-204.
10. Vischer NOE, Huls PG, Woldringh CL. 1994. Object-Image: an interactive image analysis program using structured point collection. *Binary* 6:160-166.
11. Schindelin J, Arganda-Carreras I, Frise E, Kaynig V, Longair M, Pietzsch T, Preibisch S, Rueden C, Saalfeld S, Schmid B, Tinevez JY, White DJ, Hartenstein V, Eliceiri K, Tomancak P, Cardona A. 2012. Fiji: an open-source platform for biological-image analysis. *Nat Methods* 9:676-682.

12. Liu B, Persons L, Lee L, de Boer PA. 2015. Roles for both FtsA and the FtsBLQ subcomplex in FtsN-stimulated cell constriction in *Escherichia coli*. *Mol Microbiol* 95:945-970.
13. Datsenko KA, Wanner BL. 2000. One-step inactivation of chromosomal genes in *Escherichia coli* K-12 using PCR products. *Proc Natl Acad Sci U S A* 97:6640-6645.
14. Baba T, Ara T, Hasegawa M, Takai Y, Okumura Y, Baba M, Datsenko KA, Tomita M, Wanner BL, Mori H. 2006. Construction of *Escherichia coli* K-12 in-frame, single-gene knockout mutants: the Keio collection. *Mol Syst Biol* 2:2006 0008.
15. Liu B, Hale CA, Persons L, Phillips-Mason PJ, de Boer PAJ. 2019. Roles of the DedD Protein in *Escherichia coli* Cell Constriction. *J Bacteriol* 201.
16. Gerding MA, Ogata Y, Pecora ND, Niki H, de Boer PA. 2007. The trans-envelope Tol-Pal complex is part of the cell division machinery and required for proper outer-membrane invagination during cell constriction in *E. coli*. *Mol Microbiol* 63:1008-1025.
17. Guyer MS, Reed RR, Steitz JA, Low KB. 1981. Identification of a sex-factor-affinity site in *E. coli* as gamma delta. *Cold Spring Harb Symp Quant Biol* 45:135-140.
18. Warming S, Costantino N, Court DL, Jenkins NA, Copeland NG. 2005. Simple and highly efficient BAC recombineering using *galK* selection. *Nucleic Acids Res* 33:e36.
19. Johnson JE, Lackner LL, Hale CA, De Boer PA. 2004. ZipA Is Required for Targeting of <sup>15</sup>N-MinC/DicB, but Not <sup>15</sup>N-MinC/MinD, Complexes to Septal Ring Assemblies in *Escherichia coli*. *J Bacteriol* 186:2418-2429.
20. Bernhardt TG, de Boer PAJ. 2003. The *Escherichia coli* amidase AmiC is a periplasmic septal ring component exported via the twin-arginine transport pathway. *Mol Microbiol* 48:1171-1182.
21. Yu D, Ellis HM, Lee EC, Jenkins NA, Copeland NG, Court DL. 2000. An efficient recombination system for chromosome engineering in *Escherichia coli*. *Proc Natl Acad Sci U S A* 97:5978-5983.
22. Guzman LM, Belin D, Carson MJ, Beckwith J. 1995. Tight regulation, modulation, and high-level expression by vectors containing the arabinose P<sub>BAD</sub> promoter. *J Bacteriol* 177:4121-4130.
23. Gerding MA, Liu B, Bendezu FO, Hale CA, Bernhardt TG, de Boer PA. 2009. Self-enhanced accumulation of FtsN at division sites, and roles for other proteins with a SPOR domain (DamX, DedD, and RlpA) in *Escherichia coli* cell constriction. *J Bacteriol* 191:7383-7401.
24. Bendezu FO, de Boer PA. 2008. Conditional lethality, division defects, membrane involution, and endocytosis in *mre* and *mrd* shape mutants of *Escherichia coli*. *J Bacteriol* 190:1792-1811.

25. Hale CA, de Boer PAJ. 2002. ZipA is required for recruitment of FtsK, FtsQ, FtsL, and FtsN to the septal ring in *Escherichia coli*. J Bacteriol 184:2552-2556.
26. Cherepanov PP, Wackernagel W. 1995. Gene disruption in *Escherichia coli*: TcR and KmR cassettes with the option of Flp-catalyzed excision of the antibiotic-resistance determinant. Gene 158:9-14.
27. Hale CA, de Boer PAJ. 1999. Recruitment of ZipA to the septal ring of *Escherichia coli* is dependent on FtsZ, and independent of FtsA. J Bacteriol 181:167-176.
28. van den Ent F, Johnson CM, Persons L, de Boer P, Lowe J. 2010. Bacterial actin MreB assembles in complex with cell shape protein RodZ. EMBO J 29:1081-1090.
29. Uehara T, Dinh T, Bernhardt TG. 2009. LytM-domain factors are required for daughter cell separation and rapid ampicillin-induced lysis in *Escherichia coli*. J Bacteriol 191:5094-5107.
30. Peters NT, Dinh T, Bernhardt TG. 2011. A fail-safe mechanism in the septal ring assembly pathway generated by the sequential recruitment of cell separation amidases and their activators. J Bacteriol 193:4973-4983.
31. Liu Q, Li MZ, Leibham D, Cortez D, Elledge SJ. 1998. The univector plasmid-fusion system, a method for rapid construction of recombinant DNA without restriction enzymes. Curr Biol 8:1300-1309.
32. de Boer PAJ, Crossley RE, Rothfield LI. 1989. A division inhibitor and a topological specificity factor coded for by the minicell locus determine proper placement of the division septum in *E. coli*. Cell 56:641-649.
33. Miller JH. 1992. A short course in bacterial genetics. Cold Spring Harbor Laboratory Press, Cold Spring Harbor, New York.
34. Geissler B, Elraheb D, Margolin W. 2003. A gain-of-function mutation in *ftsA* bypasses the requirement for the essential cell division gene *zipA* in *Escherichia coli*. Proc Natl Acad Sci U S A 100:4197-4202.
35. Huerta AM, Collado-Vides J. 2003. Sigma70 promoters in *Escherichia coli*: specific transcription in dense regions of overlapping promoter-like signals. J Mol Biol 333:261-278.
